# Supplementary material for: Genome-Wide Identification and Expression Profiling of Candidate Sex Pheromone Biosynthesis Genes in the Fall Armyworm (Spodoptera frugiperda)
Source: MDPI journal article supplement (doi:10.3390/insects13121078), 2022-11-23
Supplement: s1 [file s1]

## DESs

### >SexiDes2

MAPAQKHVQMCGDEIQSGLKISPVTYDADKLNIEGPQYENNNNTVLRNSANDKVNSDADF  
DISKYEAIDFKAKFRWPDLTQILLHLVSIYGLYLTFSNQVKILTLLFALGTIYTSFGGITAGV  
HRLWSHRAYRARLPLRIILALLFTVTGQRDIYTWALDHRVHHKYAETVADPHDIRRGFWF  
AHVGWLVLTPHPAVEDRRIALRPTCADLIADPVVRLQKQFFIPMFALLNIAIPIWVPWYCW  
NETLVNSFVISFVMRFTITLNI AFCVNSFAHLWGNKPYDRFVKSVENSLVSLAALGEGWHN  
YHHVFPWDYRTSELGKLNISTGFIDFFAKIGWAYDLKAATDMISKRAKRCGDGTFGESEE  
PYPSSSEKCHAE

### >SexiDes3

MAPNTEKRQVSFPKLEYPIFREAQPKSAQHWLKGKRLQDGAEDLWRIHDSLYDLTDFISS  
HPGGTHWISVTKGTDITEAFETHHLKGIAESLLPNYYVRKAIAKPRNQPFTEKEDGFYKTLK  
LKVMDQMALIPKDVRKKSDFITDSLLLALILAPLSCWGWTSQSFVIGASLTFSTGFVLSSLV  
TCAHNYFHRGDNWRMYIFNLAGMSFNDWRVSHSMHHLHTNTAQDIELSMIEPFLQFIPY  
KDKPIWAQMGAFYYPLVYATSLLSIMGHELILSATNHEGKTLSWRNFIPFTIPAWMYLMGG  
LPLHSTILLWLVTLPASFFFVYGLTAGHHNHRNFFEGDVPRDENIDWGIHQDLAICERID  
YAGNHFKSITRFGDHALHHLFPTLDHAELKYLPLVLEHCEKFDQFKTNTFYETIINASK  
QLIRKRPNNFRDVKATK

### >SexiDes4

MAHITKTISSKILNKSTHRSNSTAVSQIRIYEVGPRDGLQNEAKFVPTDIKIELINKLAAAGI  
KDIESASFVSPKWVKQMSDGVDMKNIPRVPGVNYPVLPNLKGYDIAKQCNIIEVAIFP  
AGSEAFSQKNLNCVVEGLKRFKLVADQAVKDGIRVRGYVSCVVGCPYEGPIHPKGIKIT  
EQLFEMGCYEVSLGDTIGVGTAGSVKRLMREVLTVAKPEQLALHFHDTYGGALSNNLAG  
LEFGIKTVDSSISGLGGCPYARGASGNLATEDLVYLLYGLGVNTNVDLVKLIEAGRYISNFL  
GKPTESKVNRAISDRFKKHNDIVKIASCDI

### >SexiDes5

MAQTIQTTTILEQKEEKTVTLLVPQAGKRKFEFVYQNLITFAYWHIAGLYGLYLCFTSAKW  
ATILFSFILFVIAEIGITAGAHRLWSHKSYVKLPLEILLMVMNSIAFQNTVIDWVRDHRLH  
HKYSDDADPHNASRGFFYSHIGWLFVRKHPEVKKRGKELDMSDIYNNPVLRFRQKYAV  
PFIGAVCFGLPTLIPVYCWGESWTNAWHITMLRYIMNLNATFLVNSAAHIYGKRPYDKKIL  
PAQNIGVSIATFGEGFHNYHHVFPWDYRAAELGNNGNLNTTKFIDFFAWIGWAYDLKTVS  
KEMIKQRSKRTGDGTNLWGLEDKDTPENLKNIKGE

### >SexiDes7

MAAMSGAPLLL ANATLT SKLQDDDHRYAEPMKKNRDYEWQVVWRNVFAFVYLHAAAL  
YGFYLMFTGKVRIWTILFGLLFAIMAGMGV TAGAHRLWAHRSYKARWPLRLFLALMQT  
MAFQNHIEWVRDHRVHHKFTETDADPHNARRGFFFSHIGWLMVRKHKDVFEKGATVD  
MSDLEKDPIVMFQKKTYMVLMPLLCFVIPAWIPCYFWGENPWYSWYVASITRYTVALHFT  
WLVNSAAHIWGNRPYDKNIGATDNKAVAICAFGEGWHNYHHVFPWDYKAAELGNYSTN  
LSTALIDFAAKHGLAYDLKTVSAEMIRQVRNRTGDGSHPWTKDSQEEEHYPENPVWGW  
EDTDMTEEEKQFAEIVHRKTE

### >SexiDes8

MGARVSRTDFEWVYTEEPHASRRKIILEKYPQIKKLFGYDPNFKWVVVTGMVLVQIISLPFV  
TQLSWPMMMLV VAYCFGGVINHSLMLAIHEIAHNLAFGHNRPLANKLFGFFANLPIGLPVS  
SFKKYHLEHHRYQGNEVIDTDLPTLLEAKLFCTTGKLLWLFLQPFFYSFRPLVVRPKPPT

PMELINLVIQLFFDAVVIKLWGWKAIGYLLIGALMAMGVHPVAGHFVAEHYMFKKGYET  
YSYYGPLNWITFNVGYHNEHDFPAVPGSKLPEVRRIAPEFYDTLPHHDSWSKVLYDFVM  
DPDIGPYARIKRKHHGLDS

>SexiDes9

MPPQGGQTGGSWVLYETDAVNVDSEAPVIVPPSAEKREWKIVWRNVILMGLLHIGGVYGA  
YLFLTAMWRTSLFAVFLYICSGLGITAGAHRLWAHKSYPKARLPLRLLTLFNTLAFQDAVI  
DWARDHRMHHKYSETDADPHNATRGGFFSHVGVLLVRKHPQIKAKGHTIDLSDLKNDPI  
LRFQKKYYLILMPLICFILPCYIPTLWGESLWNAYFVCSIFRYVYVLNVTLVNSAAHLWG  
AKPYDKNINPVETKPVSLVVLGEGFHNHHTFPWDYKTAELGDYSLNLTCLFIDFMAAIG  
WAYDLKTVSPDVIQKRVKRTGDGSHAVWGWDDHEVQQEDKKLAAIINPDKTE

>SexiDes10

MPPNADWEEVAQQRAIDKNTHVSFPQLKYPSLRDDGLRDPVQWLAGKAMDDGAEGLW  
RIHDKLYDLTRFIKRHPGGEEWLELTQGTDITEAFESHHLNPSTEKILTQYYIRDAKTPRNSP  
FTFKEDGFYKTLKRAAFEELKKIPKASRTANNITDGLFVSLISSAMASWVTNYYAVKF  
WYTYASINLAILTVCCCHNYIHRKTNWRMYLFNMSMWSYRDFRVSHVLSSHLYTNTLMD  
LELSSLEPFLFYTPRKDKPLHAKLGFITEIFFFPVFVFLSFVKRFLSIFLHQGFFKSHYRWH  
AIGLLLPLWMIASGAPILDVISMWLWINCTGSLIFFSIAVNAAHHHPDAIKDGDQPASETPD  
WGMHQVEALLDRKDVNGNVFAVMTLFGDHLHMFPTLDHSLVKYMHPLFIDLCEKYQ  
ANYRVSTQFKLVLGQIKETMRTEFKTKND

>SexiDes11

MAPNISEDVNGVLFESDAATPDLALARPPVQKADNKPKQLVWRNIILFAYLHLAALYGGY  
LFLFSKWQTDIFAYILYVISGLGITAGAHRLWAHKSYPKAKWPLKVILIFNTVAFQDAAM  
DWARDHRMHHKYSETDADPHNATRGGFFSHIGWLLVRKHPDLKEKGKGLDMSDLLADP  
LLRFQKKYYLVLMPLACFVMPTMIPVYLWGETWTNAFFVAAMFRYAFILNVTLVNSAA  
HKWGDKPYDKSIKPSNMSVAMFALGEGFHNHHTFPWDYKTAELGNNKLNFAFAFINF  
FAKIGWAYDMKTVSDDIVKNRVKRTGDGSHHLWGWGDKNQPKKEIEAAIRINPKDD

>SexiDes12

MVEVKEAAPVAEEQKLSKSREANWPAVLFFIHHLLSLYGTYYYYLFEVKMMTLLFFILLTS  
VALLGMTTGAHRLWAHQAYQASTGLKITLMLFQTLGIGSIYDWVKYHRFHHAHFATDV  
DPYDYNQGFHSHLLTRLRKLSPHQEKLMSIDMSDLEKDSVVMFQKRLYVWLYAIFALL  
PLNAPLEYWDDTILSSAFVIGFLRYLVVLHGSLWIESAICVWGLKPGEKSPPDNTAVFILT  
TFWPHYHYLVYPYDYKSGEYGTYDSGCSTAFIRVWAALGLATKLRTVETVTIQKALAESAR  
TKKDLKACIDAAVNNQKLPDEHYLKRA

>SlitDes2

MAPAQKHVQMCGDEIQSGLKISPLTYDADKLNAPQYENNNNTVLRNSANDKVNSEADFD  
INKYEAIDFKAKIRWPDLTQILLHLVSIYGLYLMISNQVKLLTLFALGTIYTSFGGITAGV  
HRLWSHRAYRARLPLRIILALLFTVTGQRDIYTWALDHRVHHKYAETVADPHDIRRGFWF  
AHVGWLVLTPHVAEDRRIALKPTCADLLADPVVRLQKQFFIPLFALLNIAIPIWVPWYCW  
NETLINSFVISFVMRFTITLNIACVNSFAHLWGNKPYDRFVKSVENSLVSLAALGEGWHN  
YHHVFPWDYRTSELGKLNISTGFIDFFAKIGWAYDLKAATDMISNRAKRCGDGTFGESEE  
PYPTSEKCHAE

>SlitDes3

MAPNTEKRQVSFPQLEYPIYREAQPKSAQHWLKGKRMQDGAEDLWRIHDSLYDLTDFISS  
HPGGSQWIAVNKGTDITEAFETHHLKGIAESLLPNYYVRKATKPRNQPFTEFKEDGFYKTLK

LKVM DQIQSIPKDV RKKSDFITDGLLLALIVLAPLSCWGWTSFIIGASLTLMTSYVLSSVV  
TCAHNYFHRGDNWRMYIFNLAGMSFS DWRVSHSM SHHLHTNTAQDIELSMIEPFLQFIPY  
KDKPIWAQMGA FYYPLVYATSLLSIMGHELILSATNHEGKTLTWKNLIPFLIPTWMYIMGG  
LPLHWTILLWLATMPASFFVFYGLTAGHHNRNFFEGDVPRDENIDWGIHQ LDAICERI  
DYAGNHFKSITRFGDHALHHLFPTLDHAELKYLPV LLEHCEKFEFQKTNTFYETIINAS  
KQLIRKRPNNFRDVKATK

>SlitDes4

MAHITKTISSKILNKSTHRCLSTAVSQIRIYEVGPRDGLQNEAKFVPTDIKIELINKLAAAGI  
KDIESASFVSPKWVKQMSDGVDMKNIPRVPGVNY PVLV PNLKGYDIAKQCNIIEVAIFP  
AGSEAFSQKNLNCVVEEGLKRFKLVADQAVKDGIRVRGYVSCVVGCPYEGPIHPKGIKIT  
EQLFEMGCYEVSLGDTIGVGTAGSVKRLMREVLTVAKPEQLALHFHD TYGQALS NLVAG  
LEFGIKTV DSSISGLGGCPYARGASGNLATEDLVYLLYGLGVNTNVDLVK LIEAGRYISNFL  
GKPTESKVNRAISDRFKNHSDIVKIASCDI

>SlitDes5

MAQTIQT TTILEQKEEKT VTLVPQAGKRKFEIVYFNLVSFAYWHIAGLYGLYLCFTSAKW  
ATILFSFFLVVAE VGTAGAHRLWSHKTYKAKLPLQILLMVMNSLAFQNTAIDWVRDHR  
LHHKYS DTDADPHNASRGFFYSHIGWLFVRKHPDVKKRGKEIDISDIYNNPVLRFQKKYA  
IPFIGAVCFALPTLIPVYGWGETWTNAWHVAMLR YIMN LNVTFLVNSAAHIYGKRPYDKKI  
LPSQNI AVSIATFGEGFHNYHHVFPWDYRAAE LGNNCLNFTTKFIDFFAWIGWAYDLKTVS  
KEMIKQRSKRTGDGTNLWGLEDVDT PEDLKN TKGE

>SlitDes8

MGARVSRTDFEWVYTEEPHASRRKIILEKYPQIKK LFGYDPNFKWVV TAMVLVQIISLPFV  
TQLSWPLMLV VAYCFGGVINHSLMLAIHEIAHNLAFGHNRPLANKLFGFFANLP IGLPVSIS  
FKKYHLEHHRYQGDEVIDTDLPTLIEAKLFCTTG GKLLWLFLQPFFYSFRPLVVRPKAPT  
MELINLVIQLFFDAV IIKLWGWKALGYLLLGA VMAMGVHPVAGHFVAEHYMFKKGYETY  
SYYGPLNWITFNVGYHNEHDFPAVPGSKLPEVRRI APEFYDTLPHHDSWSKVLYDFVMD  
PDIGPYARIKRKHHGLDS

>SlitDes9

MPPQGQTGGSWVLYETDAVNVDSEAPVIVPPSAEKREW KIVWRNVILMGLLHIGGVYGA  
YLFLTAMWRTSLFAVFLYICSGLGITAGAHRLWAHKS YKARLPLRLLLLTLFNTLAFQDAVI  
DWARDHRMHHKYSETDADPHNATRGFFFSHV VWLLVRKHPQIKAKGHTIDLSDLKNDPI  
LRFQKKHYLILMPLVCFILPCYIPTLWGESLWNAYFVCSIFRYVYVLNVTWLVNSAAHLW  
GAKPYDKNINPVETKPVSLVVLGEGFHNYHHTFPWDYKTAELGDYSLNLT KLFIDFMAAI  
GWAYDLKTVSSDVIQKRVKRTGDGSHAVWGWD DHEVHQEDKELAAIINPDKTE

>SlitDes10

MPHNTNWEEAAQQRAVDKNTHVSFPQLKYPSLRDEGLRDPVQWLAGKAMDDGA EGLW  
RIHDKLYDLTRFIKRHPGGEEWLELTQGT DITEAFESHHLNPSTEKILTQYYIRDAKT PRNSP  
FTFKEDGFYKTLKRAAFEELKKIPKDASRTANNITDFL FVSLLISSSLTCWVTNNIAVKFWY  
TYASFNLAVLTVACHNYIHRKTNWRMYLFNMSMWSYRDFRVSHVLSHHLYTNTLMDLEL  
SSLEPILFYTPRKDKPLHAKLGCITEIFFFPVFVFLSFTKRFLSIFLQQGFFKSHYRWHDAIGL  
LLPLWMAITSGAPFLDVISMWLWINCSGLIFFSIAVNAAHHHPDAIKDGDQPA SETPDWG  
MHQVEALLDRKDVNGNVFAVMTLFGDHCLHMFPTLDHSVLKYM HPLFIDLCEKYQAN  
YRVSTQFKLVLGQIKETMRTEFKMKND

>SlitDes11

MAPNISEDVNGVLFESDAATPDLALARPPVQKADNKPKQLVWRNILLFAYLHLAALYGGY  
LFLFSAKWQTDIFAYILYVISGLGITAGAHRLWAHKSYPKAKWPLKVILIFNTVAFQDAAM  
DWARDHRMHHKYSETDADPHNATRGGFFSHIGWLLVRKHPDLKEKGKGLDMSDLLADP  
VLRQKKYYLLLMPLACFVMPTVIPVYLWGETWTNAFFVAAMFRYAFILNVTWLVNSAA  
HKWGDKPYDKSIKPSENMSVAMFALGEGFHNYHHTFPWDYKTAIEFGNNKLNFTTAFINF  
FAKIGWAYDMKTVSEDIVKNRVKRTGDGSHHLWGWDENQPKKEIEAAIRINPKDD

>SlitDes12

MLSLYGTYLLLFEVKMMTLLFFMLLTSVALLGMTTGAHRLWAHQTYQASTGLKIMLMFLF  
QTLAGVGSYDWVKYHRFHHAHFATDVPDYDYNQGFHSHLITRLRKLSPHQEKLMSID  
MSDLEKDTVVMFQKKLYWLLYAIIFVLLPLNAPLEYWDDTILCSAFVIGFLRYLVVLHGS  
WLIESAISVWGLKPGEKSPPDNTAVFILTCTFWPHYHYLVYPYDYKSGEYGTYDGGCSTAFI  
RVWAALGLATKLRTVETASIQKALADAARTKKDLKTCIDAAVNNQQLPEEHYLRKRA

>SinfDes1

GQVAGFGVTAGVHRYWCHRSYKAKLPLQWILMICYSVAGQNTIYEWVRDHRVHHKHSE  
TSADPHDANRGFFFSHVGLWMMKKHPDVLKQGVKMDMSDIVNDPLVQFHTRYFLMFKI  
SCCWVIPSVIPVLCWNETWLTSIMSQAVALRYLLSLNITWSVNSFAHLWGFKSYDV

>SinfDes2

MPPQGQTSGSWVLYETDVVNEDTDAPPIVPSSAEKREWKIVWRNVILMGS LHIGGVYG  
AYLFLTKAMWLTSFFAVFLYICSGLGITAGAHRLWAHKSYPKARLPLRILLTIFNTLAFQDAVI  
DWARDHRMHHKYSETDADPHNATRGGFFFAHVGLWLLVRKHPQIKAKGHTIDLSDLKSDPI  
LRFQKKYYTILMPLICFAMPYVPTLWGESLWNAFFVCSIFRYVYVLNVTWLVNSAAHL  
WGAKPYDKNINPVEIKPVSLVVLGEGFHNYHHTFPWDYKTAELGNYSLNITKLFIDTMAA  
IGWAYDLKTVSTDVIQKRVKRTGDGSHSVWGWDDEKVNQEDKTLAAVINPEKTE

>SinfDes3

MAPNIAEDVNGVLFESDAATPDLALATPPVQKADNLPKQYVWRNILLFAYLHLAALYGG  
YLFLFSAKWQTDVFAYILYVVSGLGITAGAHRLWAHKSYPKAKWPLKVILVIFNTIAFQDAA  
MDWARDHRMHHKYSETDADPHNATRGGFFSHIGWLLVKKHPDLKEKGKGLDMSDLRSD  
PILRFQKKYYLLLMPLACFIMPTVVPVYFWGETWTNAFFVAAMFRYAFILNVTWLVNSAA  
HKWGDKPYDKSIKPSENMSVAMFALGEGFHNYHHTFPWDYKTAELGNNKLNFTTTFINF  
FAKLWAYDMKTVSQDIVKSRVKRTGDGSHNLWGWDKNQSKKEIAAAIRINPKDD

>SinfDes4

MLSQEEPTDTSVPRAAPRKYQIVYPNLITFGYWHLAGLYGLYLCFTSAKWTTILFSFILCV  
IAEIGVTAGAHRLWAHKTYKANLPLQILLMVMNSIAFQNSAIDWVRDHRHLHHKYSDDA  
DPHNASRGFFYSHVGLWLLVKKHPEVKKRGKELDMSDIYSNPVLRQKQYAIPIGAVCFIL  
PTVIPVYCWGETWTNAWHITMLRYITNLNVTFLVNSAAHIWGYKPYDENILPAQNIASIA  
TCGEGFHNYHHVFPWDYRAAELGNNNLNLTTKFIDFFAWLGWAYDLKTVSSDMIKLRAK  
RTGDGTNLWGEHNDELKEGKED

>SinfDes5

GNRPYDKNIGATDNKTVALCAFGEWHNYHHVFPWDYKAAELGNYSTNLSTALIDFAAK  
HGMAYDLKTVSADMIRQRVNRTGDGTHP

>SinfDes6

MAPAQQNIEMCGEEMNAELKLNPHITYKNGKVAQLDNNNTVLRDSASVVTSDSDFDIKKF  
EAMEFKAQWRWPDLTQILLHLVSLYGLYLIFSNOVKLYTILFAFCTIYTSFGGITAGVHRL  
WSHRAYRARLPLRILLAILFTITGQRDIYTWALDHRVHHKYSETVADPHDIRRGFWFAHVG

WLVLTTPHPAVEDRRIALRPTCADLLADPVVRLQQKLFIPMFAILNIGLPVFLPWYVWNETL  
VNSFIISFVLRFTITLNI AFCVNSFAHLWGNKPYDKFVKSVENSLVSLAALGEGWHNYHHV  
FPWDYRTSELGKINVSTGFINLFEKIGWAYDLKAA TNEMVSKRARRSGDGTGGESEEPYPT  
SEHCHSE

>SlitZ9

MAPNISEDVNGVLFESDAATPDLALARPPVQKADNKPKQLVWRNILLFAYLHLAALYGGY  
LFLFSAKWQTDIFAYILYVISGLGITAGAHRLWAHKSYPKAKWPLKVILII FNTVAFQDAAM  
DWARDHRMHHKYSETDADPHNATR GFFFSHIGWLLVRKHPDLKEKGKGLDMSDLLADP  
VLR FQKKYYLLLMPLACFVMPTMIPVYLWGETWTNAFFVAAMFRYAFNLNVTWLVNSA  
AHKWGDKPYDKSIKPSENMSVAMFALGEGFHNYHHTFPWDYKTAELGNNKLNFTTAFIN  
FFAKIGWAYDMKTVSEDIVKNRVKRTGDGSHHLWGWGDENQPK EEIEAATRINPKDD

>SlitZ9-2

MPPQGQTGGSWVLYETDAVNVDTEAPVIVPPSAEKREW KIVWRNVILMGLLHIGGVYGA  
YLFLTAMWRTSLFAVFLYICSLGITAGAHRLWAHKSYPKARLPLRILLTLFNTLAFQDAVI  
DWARDHRMHHKYSETDADPHNATR GFFFSHVGVLLVRKHPQIKAKGHTIDLSDLKNDPI  
LRFQKKHYLILMPLVCFILPCYIPTLWGESLWNA YFVCSIFRYVYVLNVTWLVNSAAHLW  
GAKPYDKNINPVETKPVSLVVLGEGFHNYHHTFPWDYKTTELGDYPLNLTKLFIDFMAAI  
GWAYDLKTVSSDIVKRVKRTGDGSHAVWGWDDHEVHQEDKELAAIINPKDTE

>SlitZ11/E11

MAQCVQTTTILEQKEEKTVTLLVPQAGKRKFEIVYFNIITFAYWHIAGLYGLYLCFTSTKW  
ATVLFSSFLFVVAEVGVTAGSHRLWSHKTYKAKLPLQILLMVMNSLAFQNTVIDWVRDH  
RLHHKYS DTDADPHNASRGFFYSHVGVLLVRKHPDVKKRGKEIDISDIYNNPV LRFQKK  
YAIPFIGAVCFVLPTLIPVYGWGETWTNAWHVAMLRYIMNLNVTFLVNSAAHIY GKRPYD  
KKILPSQNI AVSIATFGE GFHNYHHVFPWDYRAAELGNNSLNFPTKFIDFFAWIGWAYDLK  
TVSKEMIKQRSKRTGDGTNLWGLEDVDT PEDLKNTKGE

>HassGATD

MAAMSSTSLLLANTMLSSKLQDHDDLRYAEPRKPNRDYEWQVVWRNVLA FVYLHVS AV  
YGLYLMLTGKVKS YTILFGALFAIMSGMGVTAGARRLWAHRSYPKARWPLRVFLALMQT  
MAFQNHIEYWVRDHRVHHKFTETDADPHNAKRGFFFSHIGWLMVRKHKDVFEKGATVD  
MSDLEQDPVIMFQKKTYLVMPILCFVIPAWIPVHFWDENPWT SWYTAATRYTIALHFT  
WLVNSAAHIWGNRPYDKNIGATDNKMVAICAFGEGWHNYHHVFPWDYKAAELGDYST  
NLSTALIDFAAKHGYAYDLKTVSADMIRKRVNRTGDGSHPWTKGKVEGDHYHPENPVW  
GWEDTDMTEEEKQFAEIVHRKTE

>HassZ9

MAPNISEDVNGVLFESDAATPDLALSTPPVQKADNRPKQLVWRNILLFAYLHLAAQYGGY  
LFLFSAKWQTDIFAYILYVISGLGITAGAHRLWAHKSYPKAKWPLRVILVIFNTVAFQDAAM  
DWARDHRMHHKYSETDADPHNATR GFFFSHIGWLLVRKHPDLKEKGKGLDMSDLLADPI  
LRFQKKYYLILMPLACFVMPTVIPVYFWGETWTNAFFVAAMFRYAFILNVTWLVNSAAH  
KWGDKPYDKSIKPSENLSVAMFALGEGFHNYHHTFPWDYKTAELGNNKLNFTTTTINFFA  
KIGWAYDLKTVSDDIVKNRVKRTGDGSHHLWGWGDENQSKEEIDAAIRINPKDD

>HassZ9-2

MPPQGQTGGSWVLYETDAVNEDTDTPVIVPPSAEKREW KIVWRNVILMGMLHIGGVYGA  
YLFLTAMWRTCIFAVVLYICSLGITAGAHRLWAHKSYPKARLPLRIMLT LFN TLAFQDAVI  
DWARDHRMHHKYSETDADPHNATR GFFFAHVGVLLVRKHPQIKAKGHTIDLSDLKSDPI

LRFQKKHYLFLMPLVCFILPCYIPTLWGESLWNAYFVCSIFRYVYVLNVTWLVNSAAHLW  
GAKPYDKNINPVETRPSLVVLGEGFHNYHHTFPWDYKTAELGDYSLNLTCLFIDTMAAI  
GWAYDLKTVSTDVIQKRVKRTGDGSHPVWGWDDHEVHQEDKKLAAIINPEKTE

>*HassZ11*

MAQSYQSTTVLSEEKEPTLTHLVPQASPRKYQIVYPNLITFGYWHIAGLYGLYLCFTSAKW  
ATILFSYILFVLAIEGITAGAHRLWAHKTYKAKLPLELLLMVFNSIAFQNSAIDWVRDHLRH  
HKYSDTDADPHNASRGFFYSHVGWLLVRKHPEVKKRGKELNMSDIYNNPVLRFAQKKYAI  
PFIGAVCFALPTMIPVYFWGETWSNAWHITMLRYIMNLNVTFLVNSAAHIWGNKPYDAKI  
LPAQNVAVSVATGGEGFHNYHHVYPWDYRAAELGNNSLNLTCLKFIDFFAAIGWAYDLKTV  
SEDMIKQRIKRTGDGTDLWGHEQKCDKSGSVNDKLS

>*SfruDES1*

MKEKYLEDSPTKVFNNIEKTTCPVIENVDRIPKCIATDFSYPKHQIVWKNVIGFVLLHVFA  
LWGLVLIFTGTALWKTSIWALCVLYIGSEGVITGAHRCFAHRSFKATPLLRAVMVITQTLAG  
QNSVYTWCRDHLHHRYSDDADPHNSKRGFFFCHIGWILYKKHPYVKEFGRNIDMSDL  
QGDWMVMFQKKYYIILYLVAILVPVWVPVHYFGETWWNSLFVSFYFARYVCQLHGTWC  
VNSVAHLYGTRPYDKNLQPVESWVFSISLGEGWHNYHHAFPWDYKAAELSMHFNLSAS  
IIRFLARIGLAYKLKSASTDMVASRILRTGDGSHYKMGTEEARAAVTAWGPLHPLNPTYNT  
TLKAPDAILKPGGQPLCY

>*SfruDES2*

MAPAQKHQMCGEIQSGLKISPLTYDADKLNEAPQYENNNNTVLRNSANDKVNSEADFDIT  
KYEAIIDFKAKLRWPDLTQVLLHLVSIYGLYLTLSNQVKLLTLLFALGTIYTSFGGITAGVH  
RLWSHRAYRARLPLRIILALLFTVTGQRDIYTWALDHRVHHKYAETVADPHDIRRGFWFA  
HVGWLVLTPHPAVEDRRIALKPTCADLLADPVVRLQKQFFIPLFALLNIAIPIWVPWYCW  
ETLVNSFVISFVMRFTITLNIACVNSFAHLWGNKPYDRFVKSSENSIVSLAALGEGWHNY  
HHVFPWDYRTSELGKLNISTGFIDFFAKIGWAYDLKAATDMISKRAKRCGDGTFGESEEP  
YPTAEKCHAE

>*SfruDES3*

MAPNTERRQVSFPQLEYPLFREAPKSAQHWLKAARMQDGAEDLWRIHDSLYDLTDFVS  
THPGGSHWIAVTKGTDITEAFETHHLKGIAESLLPNYYIRKATKPRNQPFTEKEDGFYKTL  
KLKVMDDQIQSIPKDARKKSDFITDSLALLIVLAPLSCWGWTSQSFIIASLTLMTSYVLSSV  
VTCAHNYFHRGDNWRMYIFNLGSSFSWVRVSHSMHHLHTNTAQDLEISMVEPFLQFIP  
YKDKPIWAQMAAFYYPVYATSLLSIMGHELILSATNHEGKTLTWKNLIPFLIPTWYIMG  
GLPLHWTILLWLVTLPASFFVFYGLTAGHHNHRNFFEGDVPRDENIDWGIHQDLAICER  
SDYAGNHFKSITRFGDHALHHLFPTLDHAELKYLYPVLLHCEKFDYQFKTNTFYETVINA  
SKQLIRKRPNNFRDVKATK

>*SfruDES4*

MAHITKTISSKILNKSTHRCLSTAVSQIRIYEVGPRDGLQNEAKFVPTDIKIELINKLAAAGI  
KDIESASFVSPKWVKQMSDGVEVMKNIPRVPGVNYPVLIPNLKGYEIAKQCNIIEVAIFPA  
GSEAFSQKNLNCVVEEGLKRFKLVADQAVKDGIKRVGRYVSCVVGCPYEGPIHPKGIKITE  
QLFEMGCYEVS LGDTIGVGTAGSVKRLMREVLTVAKPEQLALHFHDTYGGQALS NLVAGL  
EFGIKTVDSISGLGGCPYARGASGNLATELVYLLYGLGVNTNVDLVKLIIEAGRYISNFLG  
KPTESKVNRAISDRFKNHNDIVKIASCDI

>*SfruDES5*

MAQTIQTITILEQKEKTITLPLVPQAGKRKFEIYPNLITFTYWHIAGLYGLYLCFTSAKWA

SILFAFFLVVAEVGITAGAHRLWSHKTYKAKLPLEILLMVMNSIAFQNSAIDWVRNHRHLH  
HKYSDTDADPHNASRGFFYSHVGWLLVRKHPDVKKLGKKLDMSDIYNNPVLRFQKKYAI  
PFIGAVCFGLPTLIPVYCWGETWTNAWHITMLRYIMNLNVTFLVNSAAHIYGKRPYDKKIL  
PAQNIAVSIATFGEGFHNHVVFPWDYRTAELGNNSLNFTTKFIDFFAWIGWAYDLKTVSN  
EMIKQRSKRTGDGTNLWGLEDVDTPDDLKNTKGE

>*SfruDES6*

MGNSKEELGFVSKVREFEKWMGFQTKIKWTVAFIALAYHILAVYWCYHYTLPVKWQTV  
LFAYMMFVFSFGGITGGAHRYWAHRTFKASTPLRIIMILGFASAGQNTLRQWVRNHRVHH  
KYSDTDSDPHNRRERGLFFSHIGWLLMHKNSAVVSKFNEIDMSDIDNDPIVKWHTKYVDIV  
NPLACAVIPTLVGILLWGEDWRVAIAWQCFIRMMAVYHSELTVNSLGHTLGYPYNQSIRP  
AENVFIAAITGGEGWHNFHHAFPFDYKTSELPHGIDTTTRLIHLFETFGWVQDKREVSPET  
IKKYSLQHCEGIEQIKMAEKEF

>*SfruDES7*

MAAMSGAPLLLANATLTSLQDDDHRYAEPMKKNRDYEWQVVWRNVFAFVYLHAAAL  
YGFYLMFTGKVKIWTILFGLLFAIMAGMGVTAGAHRLWAHRSYKARWPLRLFLALMQT  
MAFQNHIEYWVRDHRVHHKFTETDADPHNARRGFFFSHIGWLMVRKHKDVFEKGATVD  
MSDLEKDPVIMFQKKTYMVVMPLLCFVVPWIPCYFWGENAWYSWYVASITRYTVALHF  
TWLVNSAAHIWGNRPYDKNIGATDNKAVAICAFGEGWHNYHHVFPWDYKAAELGNYST  
NLSTALIDFAAKHGLAYDLKTVSAEMIRQVRNRTGDGSHPWTKDSQEEEHYHPENPVWG  
WEDTDMTEEEKQFAEIVHRKTE

>*SfruDES8*

MGARVSRTDFEWVYTEEPHASRRKIILEKYPQIKKLFGYDPNFKWVVTLMLVLVQIISLPFV  
VQLSWPLMLVVAYCFGGVINHSLMLAIHEIAHNLAFGHNRPLANKLFGFFANLPIGLPVSIS  
FKKYHLEHHRYQGDEVIDTDLPTLLEAKLFCTTGKKLLWLFLQPLFYSRPLIVRPKNPTP  
MELINLVIQLFFDAVILKWGGKALGYLLLGSVMAMGVHPVAGHFVAEHYMFKKGYETY  
SYYGPLNWITFNVGYHNEHDFPAVPGSKLPEVRRIAPEFYDTLPHHDSWSKVLYDFVMD  
PDIGPYARIKRKHHGLDS

>*SfruDES9*

MPPQGQTGGSWVLYETDAVNADTEAPVIVPPSAEKREWKIVWRNVILMGLLHIGGVYGA  
YLFLTAMWRTSLFAVFLYICSLGITAGAHRLWAHKSYPKARLPLRLLLTFLNTLAFQDAVI  
DWARDHRMHHKYSETDADPHNATRGFFFSHVGWLLVRKHPQIKAKGHTIDLSDLKNDPI  
LRFQKKHYLILMPLVCFILPCYIPTLWGESLWNAYFVCSIFRYVYVLNVTWLVNSAAHLW  
GAKPYDKNINPVETKPVSLVVLGEGFHNHHTFPWDYKTAELGDYSLNLTCLFIDFMAAI  
GWAYDLKTVSPDVIQKRVKRTGDGSHAVWGWDDEHVHQEDKKLAAINPEEKTE

>*SfruDES10*

MKMPPNADWEEVAQQRAVDKNTHVSFPQLKYPSLRDDGLRDPVQWLAGKAMDDGAEG  
LWRIHDKLYDLTRFIKRHPGGEWLELTQGTDITEAFESHHLNPSTEKILTQYYIRDAKTPR  
NSPFTFKEDGFYKTLKRAAFEELKKIPKASRSANNITDCLFVSLVSSAMACWVTNNYA  
MKFWYTYASNLAVLTVACHNYIHRKTNWRMYLFNMSMWSYRFLSIFLYRGFFKSHYR  
WHDAIGLLLPLWMAIASDAPLLDVISMWLWINCTGSLIFFSIAVNAAHHHPDAIKDGDQPA  
NETPDWGMHQVEALLDRKDVNGNVFAVMTLFGDHCLHHMFPTLDHSLVKYMHTLFDL  
CEKYQANYRVSTQFKLVLGQIKETMRTEFRVKND

>*SfruDES11*

MWFAILLDCFKLLTFIYCARKCGKMAPNISEDVNGVLFESDAATPDALARPPVQKADNK

PKQLVWRNIILFAYLHLAAVYGGYLFLFSKWQTDIFAYILYVISGLGITAGAHRLWAHKS  
YKAKWPLKVILIIFNTVAFQDAAMDWARDHRMHHKYSETDADPHNATRGGFFSHIGWLLV  
RKHPDLKEKGKGLDMSDLLADPILRFQKKYLLLMPLACFIMPTVIPVYLWGETWTNAFF  
VAAMFRYTFILNVTWLVNSAAHKWGDKPYDKSIKPSENMSVAMFALGEGFHNYHHTFP  
WDYKTAELGNNKLNFTTAFINFFAKIGWAYDMKTVSDDIVKNRVKRTGDGSHHLWGWG  
DENQPKEEIEAAIRINPKDD

>*SfruDES12*

MYNDLSRSCALSLCCVHRLRLPASNSSKMVEVKEAAPVAGEPKLSKSREANWPAVLFFIHI  
HLLSLYGTYLLFFEVKMMTALFFIVLTSVALLGMTTGAHRLWAHQTYQASTGLRITLMLF  
QTLAGVGSIDWVKYHRFHHAHFATDVPDYDYNQGFHSHFLTRLRKLSPHQEKLME  
SIDMSDLEKDSVVMFQKRLYWGLYAIIFLLPLNAPLEYWDDASILASAFVIGFLRYLVV  
LHGTWLIESAISVWGLKPGEKSPPDSNTVFILTKTFWPHYHYLVPYDYKSGEYGT  
YDSGCSTAFIRVWAALGLATKLRTVETVTIQKALADAARSKKDLKTCIDAAVNHQQL  
PADHYLKRA

>*SfruDES13*

MAPITFTETEVIEQPIHETDYIQYKLYQPTKDSRDTNGKSNGESCELSPYDQMLSPKDPKFL  
APIRKLEKSLGFVTPIRWFNTISISLFHIGAVLWMIRYIFLNKMPIKWQTTAFGYLLGQVAGF  
GVTAGAHRYWCHRSYKATKPLQWILILCYSVAGQNTIYEWVRDHRVHHKFSETSADPHD  
ANRGFFFSHVGLMMKKHPDVLKQGVKIDMSDIVNDPLVQFHTRHFWLKFIMCCWVLP  
SLVPALCWNWTWEASIMSQVVIRYLLSLNFTWSVNSFAHLWGNKPYDKNIMPVENWGV  
SVVAMGEGWHNYHHTFPWDYKAAELGIPMNLTTLLNYFASIGWAYDLKEASPGLVRAVA  
KARGEPAED

>*SfruDES14*

MTIQSNSLGFSTENGSKQDGKVNSLPHTPKKWDIVWRELIIFTIFHITAVRGLYLFITVAK  
WQTCIFALLYIATTTSVTVGAHRLWSHKAFAQAKLPLKVILLFFFTMAFQYSAVIWARLHR  
MHHKYLDTDADPHNAGRGGFFSHIGWMLIKKHPEYRAHKVDISDLMQDPLLRFQHKHY  
WEVLFIAFFLVPTYVPTLWGEQSSTAFYTCVCLRYVCGLHSIWLVNSAAHMGWTKPYDK  
NIRAVETKIVSMLAAGEGFHNYHHTFPWDYRIAEGDYSLNLGKLFIDTMAKIGWAYNLK  
SVPDELIEKRVKRTGDGTHPVWGWDDPDLPLEDKRMSIVK

>*SfruDES15*

MAPKDSSYIEWAHKTAAEKKTHVSFPQLKYP SLRDGGLRDPIQWLEGKAMDDGAEGLW  
RIRNSLYDFSEFLDKHPGGAEWLELAKGTDITEAFECHHLNPVVEKV KDKYYVRDAKTPR  
NSPFTFEEDGFYKTLKRSVAEELKKIPASERKRTTLIDGLVATLLISSALSCWATNYWVVM  
VSYLVASLT LAWTTVAAHNYIHMKTNWRMYLFNLSLWSYRDFRVSHALSHHVYPNTLID  
LEISGFEPITWIPRKKPAFAKFTLLIETIVFPFLFILNFLKRFISNFIRKGGFFTRHYRWH  
DVIGLLL PVWMYLASGCTFYHAFITWLWINCTGSFIFFTIGSNAAHHHPNIFKDG  
DQLKEKTVDWGMHELEAVMDRNDINDNFFKVM TFFGDHALHHLFPTLDHAVLRHLYPVFLKH  
CEEFRANYRLTSQYDFFIAQLKMAVKEDPTVLDESS

>*SfruDES16*

MPPQVDPVPSGVVFESDTQTSDLGLAKDVSVLKNASPRKHEYVWFNIFWFLYLHIASLYG  
LYLVFTSAKWQTNVFAFAVHLMCAIGIGAGSHRLWTHRSFKARTPLRIVLMLWQTMGFQD  
CIFEWARDHRTHHKYADTDADPHNAERGLFFSHMGWLCKKSPEVIEGGKRIDLTDLYAD  
PVVMFQKKHYMKMMPLLCFVLPTVIPVYFWGETWTNAFFIPTILRYTCGINVVWSVNSFA  
HTFGYRPPYDKSLNPRENIGVWMICVEGFHNYHHTFPWDYRATELPLYNMLTPTIVFIDLM  
AKIGQAYDLKYVSPEIHKQRAHRTGDGTHHLWGWDDPEFTEKLKEKYGAVSHSEENRKL



A

>*SfruDES17*

MTAANMETKSPSSNDLKNPMKDGNVNKEETMEIPKVIGTDYSYKHTIVWKNAIGFLIMHI  
LALWGVGLLFAGYMKWQSLVWTLFIAFLSTEGVTIGAHRFYTHKSFKATPFLKAIFLLCQT  
IAGQNSMFIWCRDHRLLHRYSDTDGDPHNSKRGFFFCBIGWLMHKKHPYVIELGRKIDM  
SDLQADWMVMFQKKYYYHLYFLLAFLIPVWVPVHFFGEPVLHSILVVYFARYVLQLNGT  
WLVNSAAHLYGTRPYDAKLQPVESWVFSFISLGEGWHNYHHAFPWDYKAAELTMHFNQ  
SASIIRFFERIGLAYDLKTASPELVNRIIRTGDGSHYKMGTEEARSAVTAWGPVHPLNPTY  
NTTLKAPDAILKPEGLPLYHEKDTLNLTVIQKNSRRG

>*AperDES1*

MKIIFDEILRRFERVFAFDNDIKWGSVFVIFGYHALAVYWCYNYSLPVKWQTVIFAYCTY  
VLSGMGITLGVHRYWSHRCFKATKPLQIILFLMFALTGQTSIRIWVRNHLHKKASDTPGD  
PHNATRGLFYSHIGWLMMKKTDQLIEQGKKIDMRDIDSDPLLRWYDRNVFMVNLMAAF  
VLPTMVNIWCLGESWRCAVAWQCFVRYLGVLHAQMTINSLAHKFGNRPFSNRIKPAENM  
FVSYITFGEGFHNYHHVFPYDYRTTG DYFILDY GKILLKFFEKIGWAYNLRKASPETIASAV  
GRLNCAESDDLKKS

>*AperDES2*

MAPNTKKEDELITCEGSIEKLIAPQANQRKHQIVYMNLFTEFGYWYIAGLYGLYLFFTSTK  
WSTIILNIFLIASGLGITVGAHRLWTHKCFKAKLPLQIILMIFNTLAYQYTATTWVRYHRM  
HHKFADTDADPHNATRGGFFSHIGWLLVKKHPEYLRKRKNIDMSDIYNNPVLYFQKKYAK  
PLMATITFILPTVPMYFWEESLSNSWHTTILRYTSNWNFMFLINSAHRWGYRPPYDKSIQ  
PTQNMLATVCTLGEGFHN

>*AperDES3*

MAPNITDANGVLVESDATTPLGLPIQPIQQADNRPKQFVWRNIILFAYLHIAALYGGYLFL  
FHAKWQTDIFAYILYVMSGLGITAGAHRLWAHKSYPKAKWPLRLILVIFNTLAFQDSAIDWA  
RDHRMHHKYSETDADPHNASRGGFFSHIGWLLVRKHPELKRKGKGLDLNDLYADPILRFQ  
KKYYLLLMPIACFILPTVIPVYFWSETWSNAFFVAALFRYTFILNVTWLVNSAAHKWGDK  
PYDKSIKPSENISVSFALGEGFHNYHHTFPWDYKTAELGNNRLNFTTNFINFFAKFGWAY  
DLKTVSDEIVQNRVKRTGDGSHHLWGWGDKDHDKAEINAAIRINPKDD

>*AperDES4*

MEEVNQTVETDSSAIKLSKSREANWPSVLFFIHIHLLSLYGLWLLFYEVKWMTLVLLVILA  
SIAILGMITGAHRLWAHGSYKASTGLRITLMLFQTLAGVGSIDWVLYHRLHHAHFATDD  
DPYDYRKGLYSHMLTRMRKLSPHQEKLKESIDMSDLENDVVKFQKILYWPLYAIIFLLLP  
LNAPLEYWNSDVLSTVFGFLRYGIVLHASWLIESAVCLWGLKPGEKSPPDSNSVFIITKT  
FWPHYHYLIPYDYKSGEYGTYSGCSTAFIRVWAALGLATDLRTVESKTIQKALASVAKT  
GRPLQTCIDEALKDQSLPDQHLYLKR

>*AperDES5*

MPPQNQQQDSWVVQESDEVNGEADISTLVPHTAEKRKLQIVWRNVILFTFLHIGGVYGAY  
LFLFKAMWATSLFAIVLYLCSGLGITAGAHRLWAHKSYPKARLPLRVLLTAFNTIAFQDSVL  
DWARDHRMHHKYSETDADPHNATRGGFFSHVGVLLVRKHHPQIKAKGHTIDLNDLWSDP  
VLRQKKYYLLMPFACFVLPYIPTLWGETLWNAFYVCAIFRYVYVLNVTWLVNSAAH  
MFGDKPYDRNINPVEIRPVSLVVFEGGFHNYHHTFPWDYKTAELGDYSLNFSKLFIDLMA  
KIGWAYDLKTVSSEVIEKRVKRTGDGSHPIWGWDDKDVPIDRNIAIHKSEKSK

>*AperDES6*

MAPAQQNVEVCTETVDSQIKMRLKQSDFKCTNGVTSCENNNTVLNDSVSEKLISDTDFDL  
MKYEAMEFKPQIRWPDLTQVSLHLTTIYGLYLILTQVMILTTLFAALLTIYTSFGGITAGV  
HRLWSHRAYKANTPLRVILALLFTITGQRDIYTWALDHRVHHKYSETAADPHDIRRGFWF  
AHIGWLVLTPHPAVEDRRVALRKTSLDLMADPVVRLQKIFFIPLFALLNIALPVWIPYYFWN  
ESLTNSFIVSFVTRFTITLNIASFVNSFAHLGKPKYDRFIKSVENGMVSLAALGEGWHNY  
HHVFPWDYRASELGRLNISTTFIDTFKIGWAYDLKAATPAMIISRAQRSGDGTLGEMEEP  
EPTSLDPSSSSD

>*OnubZ/E14*

MADIDATNPYDLQDKSEDDKPEDTEGELTIVGTDYSYTHRIIWPIVMVYVVMHIGAITGLL  
LVLGGNVKIASIIWAVFYSLVATEGAHMGAHRCFSHRAFKAKPLLKILLIMQITISGQHSTY  
IWCRRHRQHRYSDTDGDPHNSKRGMFYCHVGWLMTSRHPLCKKLRKTIDMSDLQQDP  
LVMFQYRYFRSLFFTFGFLLPVWVPMHFFQESFTNAVFCFFLRYVYALHVTYFINSLAHK  
YGRPYDKTIQPVETWVSVLLSLGEGWHNYHHAYPWDYKAAEIGMPLNSTASLIRLCASL  
GLAYDLKSVDPETLNKRIMNKGDGTYEVKYLQEHVTAIGPLHPLNPSYRGTCPDPEIKLK  
VRMKP

>*OnubZ9*

MAPNIKDGADLNGVLFEDDASTPDYALATAPVQKADNYPRKLVWRNIILFAYLHLAAVYG  
AYLFLFSAKWQTDIFAYILYVISGLGITAGAHRLWAHKSYPKAKWPLRLILIFNTVSFQDSAL  
DWSRDHRMHHKYSETDADPHNATRGGFFSHIGWLLVRKHPELKRKGKGLDLSDLADPI  
LRFQKKYLLLMLPLGCFIMPTVVPVYFWGETWTNAFFVAALFRYTFILNVTWLVNSAAH  
KWGHKPYDSSIKPSENLSVSLFALGEGFHNYHHTFPWDYKTAELGNRNLNFTTNFINFFA  
KIGWAYDLKTVSDEIIQNRVKRTGDGSHHLWGWGDKDQPKKEEVNAAIRINPKDE

>*OnubZ/E11*

MVPYATTADGHPEKDECFEDNEIKSNSLPKLEILYFNVMTFTFLHLSALYGLYLGFTSVKW  
ATIGLGIIFYFFAEIGITAGAHRLWSHRSYKAKLPLEILLMVFNMAFQNTALSWARDHRVH  
HKCPDTNGDPHNANRGFFYSHVGWLMTKKSDEVIKQGKLCDVADLYSNPVLRQKKYA  
VPFIGTLCFVLPTLIPMYFWGETLNNAWHFNMFYVINLNATFCVNSVVHKWGYKPYDK  
NICPTQNVLLNLAVLGEAFHNYHHVFPWDYRAAELGNQKMNPTTLFIDFFAWIGWAYDL  
KTASKEMIKSRsertGDGTDLWGHsADKLK

## **FARs**

>*SfurFAR1*

MAVETLTETQMFEKPKQGGDITYMDMVEESQPLGDSQIQKLFAGSSVLLTGGTGFLGKLVV  
EKLLRSCPDLKKIFLLARPKKNKTITKRLQEQQFDDVLYDRLRKECPDFINKISIVEGDVGQL  
DLGMCPEdRIKIMNEVEVIFHGAATVRFDEPLKTAVEINVRGTREMFKLARGCSKLKAFV  
HISTAYSNCpQNMIGEKFYESPLPGDKLIDLvetMEEKVINNITPGLLGDFPNTYAYTKAVA  
ENIVKEYSKGLPVALFRPSIVIGTSKEPVSGWIDNVYGPTGVVVGAAGLLHVLNCNPKV  
KADLVPGDMVvnACIATAWKTAKEYPSNHEDAPPPDLTPPVYNYVSSEQRPLTWEKFMN  
YNEVYGFQVPTVQAIYYLFLHLSKFLYNLYCFLHWPAYIIDGVAVIIGKKPMLRKAYK  
KITKFSEVMAYFATREWKFDNTNTQQLFKELCPADKHLFDfDMSALKWNEYFYNYIRGV  
RVYLLKDPVETVPQGIKKLHRLKYLHYTFcAILGLLFLRLLWAMLSGVFSF

>*SfruFAR2*

MTYRRVSECDAEiITQYPDPVSYVSPDFYAGKSIFLTGVTGFLGKVfLEKLLfSCEDIETIY  
ILIREKKGKTPLQRIEELFDKPLFSRLKEKDPQCKKKVPIIGELSEPGLGISKANEETLLEKV  
SVVFHAAANVQFDKELKEiINTNVCgTKYVLQlCQRMKNIKAFVHVSTAYCHTDQKVLE

ERVYPPPAELSEVLKFLHQPQHDNKKQIKEFFKEQPNSYTFAKALAETYIAENCGHVPTIII  
RPSIISSSLKEPLPGWLDTWNGATGLITASYNGANRVLLGEGSNILDLIPVDFVANLAIVAAT  
RCTSPLKVYNCCSSGCNPLTLKQLISHMNHYGCDKNVSIIFTNNKPSMSTFTFLQTTPSFT  
ADMFLRATGKSPKYMKIQSKLTLAQKALSYFTSHSWVMKADNSRKLYASMSIQDRQKFP  
CDPTDIDWKQYITIYLEGINKFLMKNYT

>*SfruFAR3*

MVVLTSSKEKSNMSVADFYAGKSVFITGGTGFLGKVFIKLLYSCPDIDKIYMLIREKKGQSI  
RERMTKIVADPLFNRLKDKRPGDLDKIVLVPGDITVPGLGISEENETILTDKVSVVIHSAAT  
VKFNEPLATAWNINVEGTKMIMALSRRMKRIEVFIHISTAYTNTNRAVIDEVLVPPPADINE  
VHQHVKNGVTEETEELNNGRPNTYTFTKALTEHLVAENQAYMPTIIVRPSIVGAIKDDPIR  
GWLNSWYGATGLTVFTAKGLNRVIHGHPNHIVDLIPVDYVANLVIVAGAKTYHSNEVSIY  
NCCSSSCNPITMKRLVGLFIDDAVKHKSVMPLPGWYVYSNYRWLVFLITLIFQVIPAFGLG  
DIGRRLGKSPRYKQLQNLVAQTQEAVHFFTSHTWEIKSKRTRELFSSLSLTDQRMFPCDA  
NRIGWTDYITDYSSGVRKFLEKKK

>*SfruFAR4*

MAPSMSIAEYYAGKTLFITGATGFMGKVMVEKLLRDCSDVKKMYLLMRPKKGHSSKER  
LDELLNFKIFDRLKAENPKLFEKLQVVAGDILSEDLGLSAEDRLLIQEEAQIIFHCAACVRF  
DMFLRDAVKMNTMGTKKVLELAEGVKNLEAFVHVSTSYCRCELPLFEEKLYPSKHRPEH  
VMHCVNWMDELLGHLQPKIIEPQPNTYAYTKSLTEDLVSQYEGKFPVIARPSIVAAAYK  
EPLPGWVDNLNGPTGLLVGAGKGVIRTMHCNENYEADVVPVDVTNACHIILGYLTGMER  
PKKINFCNITQSQINPITWGQALDMGRVHVQEFPTVCLWYPGGSASWIAHQFALFFTH  
MLPAYFVDLLMFLMGKKTFMIKIQKRINYLEVLQYYTTKEWHFTNDYFVSLQHRISERD  
NEVFYTNMKEMDWSQYIRNYIKGAREYCKEDPSTLPAARRLQKQLYYLDKAVQIMVGL  
LVSYFIYYYYFNMLYSVISS

>*SfruFAR5*

MDPALAVEMEALSRRQKAMFEATERGDSTVQQFYKDSTVFLTGASGFLGKQLVEKLFRAC  
NIRKIFILLRPKKNMTIQUERLEEMLQDPVFSVLVKKKKPNFAENIVPVKGDVAEIKLGLSDED  
WTMITNEVDIIFHVAATTRFDEALRISTMINIRGTREAVLLGKDCQKLKSFVYVSTTYSTAT  
QANVDKEVMERFYPCPLPELMVDMAENIDDERMDAIEANLIKGYPNNTYTFTKSIAEEVV  
RSRAGGMPTCIIRPAVVISSYREPVPGWADASCAFGASGLILGPATGLIHAIYASNDVKFSLV  
PVDYVNNAILVAGWHTATNRPNDVQIYSVSSARNLFHWEPISSKIRDIGKVLPTPLAVWYT  
FIVNTSNKPLFLLTWLLHYIPGYILDACCILLGKPTMFIKLYNRVNRSSLALSIFYTHTTWV  
FNDTNSDKLFNSLSKTDRLIFNFDTTDINIPEFVTLWCVGLRKYLMKDGIKNTEYAKRKQV  
LLKYLHYVVSCLYVYVLFKVACFVCYLILCLFGFV

>*SfruFAR6*

MVPRPAPQTATPPLIPEYFAGREVLITGATGFMGKVLVERLLWTCPDIGRLHLLMRHKKDC  
APDKRLALLKQSQVFDVVREQCPQQLDKLCVLPGDVTKTRFGLDQVALHQLNQVSVVFH  
SAATLKFDPLAAAAEQNVRPVLTLMDICDQLANVQVFIHVSTAYSNAELCAVEERVYAA  
PLAPRQLLALVDALPPALLQEITPRLIAPKPNNTYTFTKAVAESAVSEHAPTAHYACAIFRPSI  
VVSSLRHPFPGWIENLNGPSGVVAGAGKGLLRVLRCAARRRADMMPVDICIDTLIAVAWE  
TGVDSDREARVYQCASSAHAATWGQFRARMLRLVRAHPFDGALWYPWGVICENTVIQK  
ALETVLQTAPLCLAHCVLKACGLKQKPSLWTACKRLQAMNQALQFFATRHWFEFGTARVQ  
RLADRLHAEDTLRYNLRPETIDWEQHCVDVFKGTRRYLLRERDEDIPAARRRMKLLTVV  
HNATLLFAIFIMCRFTVVRTAPAILRGIAVLTRLRNKTALAS

>*SfruFAR7*

MSNPTIRDFYKGRNILVTGGTGFMGKVLIEKLLYSIPDIGNIYILMRPKRGKSVSQRIEDMQ  
RLKLFERIRTEKPDALKKMKALQGDVLFELGLSESDIELLSNEVSVVFHFAATLKLEAPL  
KDNVNMNTCGTQRALDIVKKFKKLDVVFHLSTAFPCYDYEVLGERCFAPPIKPENVMKLI  
QWLDDKQLALLTPSLLGHPNICYTFSKRLAESIVEQAYAEPLVVIARPSIVCPSLKDPVPG  
WVDNLNGPIGLMLGAGKGVIRTMCDGSLIAQVCPVDIAINGHIAIGMIEGNRKEKPTSLP  
VYNVNNGHQKPTTWGEVLQIAKDYGRKFPLSWPLWYPNGDITTNVLAHEYRRIFYHLVP  
AYLIDFLLFVLGQKRIMIRIQUERISNGLEVLQYFTMRPWNFPCPNYDAIKDKLNPEEQEIYN  
TDITEADREVYLMNCVEGGRVYCFKEDPTKVPYNRIYHRFLYFLDWFWKIMFWLFLVLSFL  
ASWFEPIKALFSYGEPVVKHLPFLGKAVCQVEEL

>*SfruFAR8*

MASETISAELEYLPDRIADTFSGMKVLITGGTGFMGKVLVEKLLRKCPDIDQILLFVRSK  
KGKNPKQRLEEIFSGALFDQLREMRGGVEPLLEKVTILINGDVSEPDLAMSPEDRQMIINQ  
VDIIHAAATIRFDEELKKAVLLNVRGTKLMVELGKACQKLVFIHISTAYCHLHEKLLLEEK  
AYPPPADPHQIIQAVEWMDEETIATMTPKLLNKLPSYAFTKALAEALVVEAMEKANLPA  
MVLRPSIVIPWQEPVPGWTDNINGPTGLLIGAGKGVIRSMYCKSNSYADYLPVDVFINGI  
MIVAWNYIKNGDTKCNINFTSSAEIKVTWSEMIDAGREIMNRVPLNGVWVYPGGSMKH  
SRLYHNICVFFFHWIPAFIIDTLLFCLGYKPVLCRVQRRTKGFEVFEYTTNNQWDFKSDIA  
QTLRQKLNAKERRDYKVDAGLDISKYFEDCIRAARIFILKEYDDTLPAARRHMRIMYWV  
DVIVNCLFWGFLLYWLSGWMTTTTKAIVPDTASPTVIAMDA

>*SfruFAR9*

MFNLCKMNGVQRSVGRNCVVFNKIVVVKPIRGYSNASSVISKDKYQSVADFYSKGKSVFM  
TGGTGFLGKVYMEKLLYSCPKLDKLYLLIREKKGVSADKRIADLFENPLFKRLKSSNPDF  
MKKVVLVPGDLGLPNLGISPSDEQTLIDKVSVVYHAGATVRFYEPLVPSININFDGTRKML  
ELSQRINKIEAFVYVSTAFQAQANAKVLVETAYPSPAKVEDVYKFIEEHGHDKHAVKKFIGN  
HFGTYAFAKALSEAYIAKNHGKVPVIRPSAVTATKDGPVKGWLDNWFNGASGILYYINKG  
VIRILHGHGNHTVDFIPVDYVSNLCIISALRAKESNEVQVYNSTSTSDNPVNWDITFNTMK  
EEKTLSGKNKFPYLSMTYVDSKLALQLGTFFLQITPAVLADLWLKIKGKDPKYLKMVSQA  
LTIRNAYDYFTTNNFILRSRDTRELHSSLSPEDREEFPCDPTQIRWPEYLKDNMNGIYKYLK  
PSKIL

>*SfruFAR10*

MSSATQNASLAQTPVTHEKMEKWVDAQVKGEKVDIDVYGKPTDKMLKELENVRNLSKE  
LQDNLHELENSVRIAEVENQAMNPTAQILDFSEDHEFVPDKKDTYYAEEDKLDAKEEEKR  
KLTKGKGPKTEIQEFYKDQCFLTGGTGFLGKVLIEKLIRSCGDINTIYVLARNKKGKDPR  
VRLHEMMDDFLFHRAHEENPKGIHKVVPILGDMELPGLGINEEDRKMLASKVTIINAAA  
TVKFDEKLSVSTAINVKGTKEVLKLAKECRNLKAITHVSTAFSNTQVKHIEEKFYEPMSV  
EALAEISEVDEKLVESILPTLLGTRPNTYCFTKAVAEAEAVRTYGEGLPICIVRPSIVVSTYEPP  
VRGWTDVYGPGLVIGIGTGVLRTMYMDQEKVADMVVDLCVNAILASAWYTARNYK  
ENQTSHPYINNFVSGAQNPLTWGEFIARNRKYGIDKPTTKAVWYYGLNPTNNYYMFLFYNN  
FFLHYLPALMIDTYCAVTGKRRAMKLYSKVMKLANILFYFSTQDWKFSDMNVRNMWN  
SLSDADRVVFPFSIGEMSWEYMCETFLVGLRVYLIKDDLSTLPEARKKWNKLFYLVHQLVK  
IITLSLVLYLTYFVLQPIIALVFN

>*SfruFAR11*

MSAPEPGEGPLLPGFYAGRAVLITGGTGFLGKVLIERLLYTCPEVGEVHLLLRDKRGQPPR

VRLNQLKQSQAQFDKVVRAQCPGQLDKLRVVCGDVAQPRLGLDDAALQQLREVSVVFHSA  
ATVKFWESLETALHQNVTSSVALMDLCDQLPKLEALVHVSTAYSNAERRNIEERVYEAPA  
QLAGLRAMLDALPPSLDDLTARYIAPKPNTYVFSKAVAEATIAQRPRKHYATAIVRPSIVV  
SSHRHPFGWIENLAGPSGVVVGCGKGLVHAFNLDLAARADLIPVDITIDTMLAVAWEIAT  
DKSGEVRVYNSSCSQQNPITWRAFRDRVVRNVRAHPFDHLMYYPFTFGIKNRYVYKTLEL  
VLQTVPLHVADYLARLCGVKLQLSLVTVSERLQAMNRVLAFFATREWFSTRNVHALRR  
RLTRADRDIYNLDVCSVDWDEHVRDFVKGTRKFLLEKDDNIPRARRFVERLRRVHQFV  
LLVLSALLYRLLTLLPRFLFRSAPALAGPH

>*SfruFAR12*

MADPSQVRSFYAGKNIFITGGTGFVGLCLIEKILRCIPDAGKIYLLMRPKKGKEIADRLQEF  
PKNPVFEKLLSNSTDIFKKLIPIAGDVGEENLGLSPQDRQTIIDNVNVVIHSAATLDFQESL  
RPTVNINLLGTRRVMQLCKDAKNLKVMIHVSSAYVNSYLTEAHEKVYEAPEDPEKVISLV  
GTLNDEGLLEVEPKLLKSHPNITYTFTKHLAEHEVVKCADLFPCTIVRPTMIVASWKEPVP  
GWTCSKVGPPQGFLMGAAGVVRRLPLAKENVADYIPVDVVVNQLLVAGWEAANSRSGL  
TVYHCSSSTCHPFTWSMLDDTVNSMLHKYPLKSAVWYPYLFVPSLLMFRISAIFVHFFP  
ALLLDLMLRMTGGRPIRLHKNVWNSLNRLERFIFSEWKFHNPNTLELATKLNQTDKEL  
FFIDISKLYWVEYFKTLHLGVERRYLNKEKESSLPAARKKDTVLLLFHVIWQLVIMGLVWY  
VFACATGLTLAHSAPAPIIYILFTCL

>*SfruFAR13*

MAPNVLEYRGGKNIFITGGTGFVGKALVEKLLRSCSEVNAIYLLMRQKKGVSTEERLKDL  
CSKPVFDMVREKNPSGFKKLRIINGDITEPGLGISEEDVRLQKECNIFHSAACVRFDQKL  
KDAVNMTSGTLRMLTLAESMQNLEVFVHLSTAYCRCDLVDLEEKVYAAVHKPRKIMDI  
VEWMDNDTLDHLEPKIIESEPNTYSYTKAITEDLVNEYSKGFPPIAARPSIVTAAWKEPIPG  
WVDNLNGPTGIVIGSGKGVIRTMHCEPSYKADAISVDVVANACILAIYVTGLDKPKETQV  
YNLTLSGVISLTWQEIILGEKWVNEYPTYTMALWYPGGSIKSYNFTHQIDKFFSHLVPAYL  
VDALLFLLGKKTFFMINLQKRISHGLNVLQYYTTKEWHFRNNNYKALRTRVSPEDNEEFYT  
DASTLNPDEYLKNYVLGTRKFCCHEDPANLPRARKLHRIRYFADRLFKLLFIILVLWTLYS  
NSNVFTSSVELLDNSLKSPLMNQANAEIIPNIAL

>*SfruFAR14*

MASCLSGGHYVPGSKEYVPVAEFYADKSVFVTGGTGFMGKVLVEKLLRSCPKIKKIYLLM  
RPKRQGDVASRLTELTSPLFETLRRERPQELNKIVPIVGDITEPELGISAADQTMCLQKVS  
VVFHSAATVKFDEKLKLSVTINMLGTQQLVQLCHRMLNLECHVVDSEYCNPDVTRDEW  
KEYGVLLPPAHPEHVTLVQTLPPDDLVDRLTPDLVGDRLPNITYTFTKALAEDMLIKESGNLP  
VSIVRPSIVLSSLREPVGWVDNWNGPNGIIAAGVGKGIFRTMLGTGTVADLVPVDTVINL  
MIVCAWRTHLRRGEGVVVYNCCTGQQNPITWQRFVKTSFKYMRKHPFNEVLWYPGGDI  
TSNRLKHGTLSSLQHRAPAAIMDLVSTATGKKPMMVRVQNKLEKAAACLEYFTTRQWAF  
ADDNVQALCASLSPDDRRTDFDNVRNIDWDAYIESYVLGIRRLFKESPDTLPKSRAVLRR  
LHIVHILTQVATVFFLWRFLFSRSNALRSIWRRVLELLTRAARLLAIA

>*SfruFAR15*

MGFLEERDLCEVPTIPEFYKGKTIFITGGSGFIGKVLIEKLLYSCSELDRIYLLMRNKKGVK  
SEDRLAQLYATPCFDRLKKKKPNVFNKSVFVSGDVLEPGLGLSQEDRALLVNRNVNIFHV  
AASVRFDDTLKYAAQMNLRGTMQVMELAKEVRDLSAVVHVSTSYSNTNRDPIEEVLYPP  
LADWRETLAVCETADEHTMRVLTPKYLGEPLNTYFTTKQLAEHVVAEYKQQLPIVIRPSI  
VISSVEEPSPGWIENFNGPVGIFVACGKGIMRTIHTKPDIIICDFIPVDICAKNIIAGAWIRGTK

PIEPTDDIEIYNCCSGNLNNMLMGDLVEMSKHVSKEVPLDDMLWHTGGTITTNPVYHYIK  
VLVQHLLPAFLVDLTLLWLIGKKPMLVKVQRRRIYIANLALSYYLTQQWTFDNTNFVQLRSV  
LKQADMKQFYDYDLETTDLVEYFTKCCLGRRFLLKEKDEDIPKARAHCKRMMILDQAM  
QVLFHAVFLWWVCKKIVQLFGIQSNLF

>*SfruFAR16*

MDSKFMSSDKMDEYQKHIEMMNNDLNLNLNYESHMNMEHPDKTSEAIADFYEDSIIL  
VTGGTGFVVGKALLEKLLRSCAGIKTVYVLMRPKRGLTVDQRYKELLKNQVFDRIKWP  
ERLGKLYPITGDVSAPNLGVSPEQRELLGKVTAVFHSAATVRFTEPLHAATTLNVQGTASL  
LKLAEDMPKLKALVHVSTAYSNA PRSHIEERVYPPYPDPDSIVRCTKMLPPETVEVISDTLQ  
GEHPNPYTLTKALAESIVYGHTNLPVCIVRPSIVTAALQEPYPGWIDNVYGVGTGIIMEISRG  
TYRSGYCRERYVVDLPVDMVNVNSCILAAWRQGVKQPGRCPVYNVTSGSINPLQWGQFT  
KLCVKWALENPTKYVMWYPNFAFTESRFMNTFW EITCHFLPAFMYDLLLRAQGRKAIM  
MKLARFRKMAAATGEYFANHEWQFGIAELTALHDDASYARDSGAFPHWPADFDWDSYI  
GAYMFGIRRYILKDTAESLPVARTKLRRLYWVHKL FQAATGYIYFRFLAGRLR

>*SfruFAR17*

MSKANCSNVASFYAGKSVFITGGTGFVVGKTLIEKLLYSCNGIDKIYVLVRDKYGKQASERL  
ARVTSTPVFDRKTSKNEELKKIVVISGDITRENGLQEDVLKTLENEVS VVFHLAATVAF  
KLPLKDAMRINVTNGTENVIALCRRMKKLQAFVHVSTAFTNSDRKEINEMVYPMPINLEEA  
RHVADTYSHDDVIVSAFMGKKPNTYTFSKAFAEQQVMKQCEDLPTAIRPSIVMSSIKEPC  
PGWIDTWNGSTGLFVGMPAGILRVVLGRGSNVTDLVPVDIVTNLIVVAATECQKSKEIKVY  
NCCTGTSNPITCDEATTISRKVALKYSNELPWFLMFTPSVFLYTLITFLLQIVPAYLIDLW  
CILTGRKATQIKLQRRLLKKVVD AVKFLLNEWKFSDDNIRDLLKTMSPV DKEIFNFDVKTI  
NWETCIEDYILGARKYLLKSEK

>*SfruFAR18*

MGFLEDRLDSGVPSIPEFYRGKTVFITGASGFMGKVLVEKLLYSCPDLDRIYILLRSKKG V  
NPEDRLAKMLSVPLFDRLRKDRPGFASKVFVIAGDVMELGLGISEEDRALIVNRVNIVYH  
VAASVRFDDTLEYAIRMNLRG TKEMVELAADIRNLDVFIHVSTSYSNTNRETLEEIYPPHA  
DWRETLEICETMDPHTLKVLPKFLGELPNTYTFSKQLAENVVAEYKGILPVVIIRPSIVISS  
VEEPVSGWVENFNGPVGLMLGCGKGILRSMYSDPDLIADYMPVDIAIKSFIVASWLRGTK  
KLSPTDDVPIYNCCSGRLNIITMGDMIEKAKRISWTPFNDILWVPGGGLTTSRTVYYYVKL  
LIQHLLPAMLVDIILWCAGKKPMLFKIQRRRIYASMA LIYYITKQWTFDNKNLVLMR SKIKE  
EDMKDFYYVMENV DQDEFFVNATLGCRRYLLHEKDED FPKAKRHYRRMVIVEIIAKIIFY  
GALLWWFFNLNYTKKFISEWSH

>*SfruFAR19*

MGFLEDRLDSGVPSIPEFYRGKTVFITGASGFMGKVLVEKLLYSCPDLDRIYILLRNKKG V  
KSEDLAQILAAPLFDRLRKERP GFESQVFVIAGDVMELGLGISEEDRALIVNRVNIVYHV  
AASVRFDDPLEYAIRMNLRG TKEMVELAADIRNLDVFIHVSTSYANTNRETLEEIVYPPH  
ADWRETNLICETD SHMLKVLPKFLGELPNTYTFSKQLAENVVAEYKGILPVVIIRPSIVIS  
SVEEPVPGWIENFNGPAALLAACGKGILRSMYTD PDLVADYMPVDISIKSFIVASWLRGTK  
ELSPNDDLPIYNCCAGKLNVTMTGQMIAMGRQIYPSVPVNDMLWTPGGDLTKSKTLHYI  
KVILLHLLPAIFVDITLWLAGRK PMLVKVQRRRIYIANLALQYYITKQWTFDNTNLVLMRTK  
IKDEDRKHFFYYEMENIDQYKYFVNAVKGKKYLLKEKDEDMPKAMKHYKRMVVVDIIV  
QIVFYSALLWWFLHLNCIQNLISQIYHES

>*SfruFAR20*

MDAAEEVILKALDCQKGTKSVIDRGDSTVQQFYKDSTVFLT GASGFLGKQLVEKLFRTCK  
LKKVYVLMRPKKGKSVEERIDEILLDPYDILRKEKPDFTKRIPIIGELAEKNLAISEADRRI  
IIEVDIIFHVAATISFQEPLRSAALVNVRGTKEMIVVAKQCRRLRSFVYMSTAYSHATYSR  
GGTEIMEEFYTSPMCPELMIELAESLEEERLNRIKDELIKDWPNNTYSFTKALAEELLRINSK  
ELPVSVIRPAVVVCARREPYAGWIDLSSVFGPSGITLGCMMGVIHSLQSVQGIRIDFVPVDY  
VNNTAIVAAAASKGATKIYHVATSKRNHLTWGGLTNILNNVARRTIVSPHAIWYCFVVQSP  
YLWLHQLVSFLLHTIPANLADGACVLMKKPPRLKKIYTTVTKMASTIAFYSNHGWIFNDT  
NALQLFQSLSKSDRVIYHCDVSDLEWTELIVLWCVGLRKYIVKDGLNTTQKGMKKQQIFR  
ITTYVISFVFFAVIFLLFYCLFKLLCNFVIGF

>*SfruFAR21*

MGETEALDPAQELELHFMARQKPMHEATARGNSAIQQFYNGQN VFVTGGTGFLGKQLIE  
KMFRATNVSKVFVLLRPKKGKAVELRINELLQDPVFDWVKEHKPKALNKIVPIAGDVAE  
MRLGISDKDWKMLAAEINIIFHMAATTRFDETLRVATMINVRGAREALILGKACKQLKSY  
VHVSTAYSACDNLIDTEVLEDFYKSPIDPDTLIKMTETVDETRLNSITPSLIKNWPNTYSF  
GKAVAEETVKNMCEGLPLCVVRPAIVICAMKEPSPGWLDMSNVYGASGIVLGP GIGLMHS  
FMARDDVHIGLVPVDYVNNAILAAAWETAKRVAAGQTAPKIYSVTASTRNPTRWDNLVNI  
NTSEVRTNYPTPAAIGWSFVWQTQYPLVFLIYSWFLHFIPGHVVDGICVLLGKERRFLKIY  
KKMYNMCALS YFTTNWRFVDDNTAALYNSLSTIDKEIFDFDVCKINWREYMYIWCIG  
LRKYIHKDGLKNTVYARRKQFVFKILT CMFMPLYVFALYKVFSFFVLTLFSFLGYFLHALGF

>*SfruFAR22*

MAEVDIMDPAQEYVETMLNRHKKMDDITERGDSEVQKFYEDAVVFVTGGTGFLGKQLV  
EKLIRSTKLSKVYVVL RPKKGKGVEERLRALLKEPVFDKLRKLQPEFASKITPVAGDVSEP  
NLGISEQEWNIMATEVNIIFHLAATTRFDASIRESTLINIRGAKEALRF GKQCRNLKSYVHV  
STAFANACHSRINAQVEEDFYPPPMAPDMMIDLVESVEEERLNNMTPSLIKDWPNNTYCFT  
KAIAEEAVRAESGKLPICVVKPSIVIGAMKEPHPGWIDVSAVYGVTGAGLGKALGLMHTS  
MANSKVFLGLIPVDYVTNATIVAAWETAKQKSTKDENPKVYTVISSTRSPKMWSDLKYL  
MTDITLWKYPTPTTMAFSLYFQTRSPFLYWVYSWLFHMIPAYIADGVCSLLGRQRRFVKL  
YTKMSKLSALS YFSLNNWHFADNNT EALYDNL SAADKEIFSFDIDRLNWTEFISSWVIG  
VRQFILKDGLVNTRYAIKKLKVL RALTYIGTAIYLFVLYKIVYFSYSMLSFAVGTVF

>*SfruFAR23*

MAVETMDPAQVFMAKITNRFKPVHDLTARGTSSVQQFYSGATVFLTGGSGFLGKQLIEKL  
LRATRVSKIYVLLRSKKGKNVQQRLLEMLKDPVYETLREQQPDFVDKIVAVSGDVSELKL  
GLSDKDWNTIADEVDIIFHMAATTRFDETLKRATFINVRGTREILDIGKACKKLRSFVYVS  
TAYTHASADRVEDAVLEKFYPSPVSPKTMIGMAETIDEERLNDITSLTKSWPNNTYTFTKAI  
GESLVESIGKDLPLCVVRPAIVVGTKREPTPGWLDVSCIYGATGLLLAVGLGVMHTSYARP  
DNQIDLVPVDYVNNAILVAACETARTKRATSQHNETKIYTVTSSTRNRFTWDKLDYLLTNE  
ARYYTPPKAVGYGFVWSTYNRLLFWLYTWLLHLIPAYIIDTIAVVF GHKRRYVKLARKMQ  
RLSDVLAYFLTNGWKFEDQNTVTLFDNL SKDDKQIFNFDVTDIDWTEYILIWCLGLRKYV  
IKDGLTDTLYACKKQTIFKFATYTLLPLYFYGLFKLMYCAVAFLYVTFLK

>*SfruFAR24*

METETLDPAQAFMAKVSDRFKPVHDLTARGTSSVQQFYSGATVFLTGGSGFLGKQLIEKL  
FRATKISKIYVLLRCKKGKSMEQRLVDMLKDPLYDTLREQQPEFANKIVAVSGDVSELKLG  
LSDKDWNTIADEVDIVFHLAATTRFDEELKLATFINIRGTREVLALGKACKKLRSFVYVST  
AFSHARDEYIAGDVLEKFYESPISPENLIGVAESMDEERLNNITSLIKGWPNTYTFTKAVA

EELVRTMGKDLPLCVVRPSIVTCSIQEPSPGWLDLSCIYGASGYVYAVGLGVAHTAYGEHS  
NKLD FVPVDYVNNAILTAAWETTRTKSSAPGKDEIKIYTVSTATRKPITWRVVDILANKA  
RYYPTPKAVSYTFAWCTNIRLLYWIYAWLLHLIPAYIVDAVMVLFGKERRFGKLAQKLSK  
MTMALSHFLSHHWKFDDRNTVALFESLSEDDRKIFNFDVTDIDWSEYILVWCLGLRKYFV  
KDGLNGTIYGRKKQTVLKIVTFIMMPYFYGLFKIVYCVFYFLVLFNLLFK

>*Sfru*FAR25

MAMETETLDPAQALMMKISDRFKPVQDLSARGTSSVQQFYSGATVFLTGGSGFLGKQLIE  
KLFRATKISKMYILLRCKKGKSIEQRLQEMLQDSLYDTLREQQSDFAKKIVAVSGDTSSELK  
LGLSDKDWNTLADEVDLIFHLAATTRFDETLKMATFINIRGTREMLALGKACKKLRSFVY  
VSTAFSHARYDRVNMEVLEQFYPSISPETMIGIAETLDEEKINDITSLTKKWPNTYTFTK  
AIAEELVNTMGKDLPICVVRPAIVICTIQEPAPGWVDKSCIYGASGCLFATGVGVMHVTF  
KRDNLVALIPVDYVNNATIVA AWETA KTKRLAPENNEIKIYTLTSSNRNVIYWDAFEGIMC  
GEVRNKYPTPKMVGYSIKITHNRLLFWIYSWIMHLIPAYTLDAFAAGGKICLYYVRVDKF  
GKLAQKLLKLTALSYFLTHQWKFDLNTAALHASLSEDDQKIFNFDVTDINWEEYMCT  
WCIGLRKYLKDELKGTLYARKKQTVFKYATFILFPIYLYEKDKGFGVELDVDIHCSPVIS  
P

>*Sfru*FAR26

MEVDTLDAERHELALLEKQRP MNAVIDLGNSPVQQFYKGT TIFLTGGSGFLGKQFMEKIF  
RSCEIERIYILLRPKKGKTIAQRLTYILKDPLYD TLRKKKPNFANDIVPIEGDVADVRLGLSD  
KDWD TLTKEVNVIVHLAATVRFDEHLKKAGLINVRGTREMLELGKQCKNLKIFNHISTAF  
AHTTKSRINNEVREQFYPTPVL PDTFIDLVENMEEERLTEITPGLIKGWPNTYTFTKAIAEEL  
VRTRAGELPVCIVKPAVVLG SYTEPSPGWIDKQTVMASPVGFLLGCGIGVMHVLYLKRDN  
QFVITPVDYANNAILAAGWDSVQNRKAIDSEVP IYIVGTATSNFTWDNLLNLTDELVKII  
TPKALYYVCAAHTSNPVVFWILT WLFHYIPGYFIDAIVNILGVRPKGLPSLSIYSKYKLC  
KVYEYFLFNNWKIRDDNLVSMMDRMAPADQAIFGCNVREIDQRGIALSMSVGLRRFIVQ  
DGLKDSEYGQKKMRILKYVHVVCVLLYSYLIYSVFRTIYSAFCVIIPV

>*Sfru*FAR27

MDLAQEVENKALASYEPVEKLMRQGTSDVQR FYANETVFLTGGSGFLGKQFIEKIFRSCA  
IKKMYVLIRPKKGKTIQDRIQFILSDPVFDKLRTVKPNFAEQIVLLEGDVADIRLGISDKEW  
EMVAKDTSIIVHMAATIRFDSPIRDAVVTNVRGTREVISLAKDCKHIKSFVHVSTGFTHATA  
SRIGKDLREEFHPCIPSPSAIIGMVETMEDSRLDNITAELIKDWPN TYTFTKAIAEELVRTTA  
ADLPVAIVKPPLVLT SYIEPSPGWADTSIMTGPCGVLIGVGLGLLRVFY LKSDLNLNIAPVD  
MVNNAIIAAGWDSVANRPASDGIPIYTVSSTKCGIPWNYFGSLVRSEEFKHLACPKAVWY  
CYLIETTNNLLYLFLFWFLHYIPAYVIDGICYVMKIKIGIPSATKVYEKIYKVSKVFGYFM  
TNEWHFKDDNLVAMINRMSETDKTIYNCDVASINYKEFLIRMIVGLRK FIVKDGLIDSEKA  
YRKQKRLFYANLVFMTLYIYVWVMIAFYMFKG IYIVY

>*Sfru*FAR28

MAAVSQLISVSDVISENLNKNENNTYCAQCNDSDENMNNMSDNLTEVQKFYNGKNILI  
TGATGFLGKILVEKLLRCCPGVENLYLLVRQKRGKDIYTRMEEIFDDPVFSRLKEEV PKFR  
HKVVVPADCEAAGLGLTLTDRQMLTEKVNII FHSAAATVKFDEHLRAALVTNVMAPLHLL  
RLARDLKKLDVLMHISTAYSNSHLPLIEERFYPCEADCEQLHQMV DKLTDQ LNSMLPKI  
LGPWPNTYTFTKALAEKELRASAGGMPIGIFRPAIVISTAQEPLKGWLDNMYGPTGVAVGS  
ATGILRTMQCDELVSADIVPVDSVVNCLMVAACSVHNAYKRSSPPLEPIFYVSSVENRIT  
WGDFLSKNMAWIIHYPFSDAVWFISVRLTKSA AVNKVYMFFLHLVPATLVDGLAVCLGR



KPKMLKVYRKIHKFSSVLSYFCTREIKFCNSRTRELWEKTSEADKKLYPFSMSSELNWEEYF  
RDYLAGIRRYLFKESDDTLPQARIKWKRLYYLHQITRFFIFILAVYALWWILSLMW

>*SfruFAR29*

MGRRLAAISPDVAMVPRPVSPSPAELVPRFYAGRSILITGATGFMGKVLVERILATCPDVG  
RLHLLMRDCKKGHSPQKRLAQLKQSQVFDKVRARNHRQLDKLCVVSGDVSKPQLGMDA  
DAIAQLREVSVVFHSAATLKFDEPLPVALDQNVRSVQRLLDICDQLPKMQAFIHVSTAYSN  
AELAVVEERVYPAPVPLAQAQCTLAQTLPGDLLGQINTQYISPKPNTYTFTKALAETVVQEH  
GNRGYPVAIFRPSIVISSLRHPFPGWIENLNGPSGVVVAAGKGLLHVCCRSAARADMLPV  
DMAIDTLLCVAWETAIDRPESVRVYNCSTCENPTTWREFEALRRHLRGHPLDNAFWYPC  
GFTVENKLTQKTLEAVLQTAPLHVAEYISKILGIKTKLSLITVSQRLVAMNDVLRFFSVREW  
HFVTDNVRKLLHARLTPQDAIYNLDPQTINWDEHYCNFVKGARKYLLQEKDQDIDEAKK  
HLRRMYYLHQGVLFVVTLLCRLALQNQYLRAFIYRTFRMLLTVAGSAYMRIRQS

>*OnubFAR6*

MVSCKDDVTAQIPQFYAGRSIFITGATGFMGKVLVERLLTTCPDVDQLFLLMRTKRVDGPE  
KRLQQLKESQVFDNVRQCSPAQLDKLCIVPGDITKPQLGMTGESIAQLRNVSVVFHSAAT  
LKFDEALGLAVDQNVRSVRLMELCDMLPNMQAFVYVSTGYSNAELSVVEERVYPPAP  
LEQVLALTEAMPEDLMASVTRKYIHPKPNYTYTFTKAIAEVAVQQHNSSYPRAIFRPTIVVS  
ALRTPFPGWVENLNGPTGVIAGVGKGLLHFFSCRRDARADMVPVDIVIDALLAVGWETAI  
DRSSEVRVYNCSSYNNTTWRTFEAALSRYIREHPMDQVFWYPYGSIVENGVAQKCLELL  
LQTMPLHLADYCSRIFGIKTKLSFIMVSNRLQAMNTVLQFFSQREWKFITNNMERLRQRL  
TPADAAIFNLDVKTINWEELCTNFIKGTKKYIFKEKAENTPEAKKHLQRMKLLPPWCNFI  
HFNPASTTHL

>*OnubFAR4*

MAPSMTVPEYYAGKTLFITGSTGFMGKVLIEKLLRSCPDIKKIYLLMRPKKGHGSKERLD  
GFMNCRVFDKLGSEHPEQFHKLQVVPGDILMEDLGLSVEDRDTLQRECQVLMHCAACV  
RFDMFIRDVNMNTVGTGRVLDVASGMKQIEVFVHVSTAYCRCEVEVLEERLYPAKHRPK  
HVIETVNWMDDELLTHLQPKIIEPQPNYAYTKSLTEDLVAQHAGKFPIVIARPSIVTAAYK  
EPMPGWVDNLNGPTGLLVGAGKGVIRTMHCNENYAADIVPDMVNVNACILLGYTTALEK  
PKEVQFCNIAQSGINGFTWGEALALGRIHVMEYPFSICLWYPPGAPSASRLRHQVTLFLTH  
TLPAYTVDLLARALQQKPFMVKMQRISGLEVLQYYTTKEWHFRNENLRALRTKVTEE  
DDETFYTDLTVIDWNTYIRDYIKGAREFVMKEDPSTLPQARRLNRQLYYLDTFTKIFIYSII  
ASSWMKRSISNILKMFVAA

>*OnubFAR2*

MNHSLEASPLIPTEVTRDKMERWVEAQNKGEKTEVDVYGKPSEKQIKELNIRSLSRELQ  
DNLHELENSVRIADVENQAMNPTAKILDYSEDHEFVSANQLDNYYAEEDKVDAKEEEKR  
RLTKGKAGKTDIQQFYKDQCFLTGGTGFLGKVLIEKLLRSCTDVTIYVLIRNKKGKDA  
RVRLHDMLEDFLFHRALDENPKGIHKVVPPIIGDMELPGLGISDEDRRTITSKVSIIINAAATV  
KFDEKLSVSTGINVRGTKEVRLLAKECRNLRAITHVSTAFSNTHVPYIEEKFYDPPMSVEA  
LEAVSEINEDLIDAILPTLIGKRPNTYCFTKAVAEAAVRKYGEGLPICIVRPSIVVSTYEEPVR  
GWTDSVYGPTGLVVGTTGTGVLRTMYMDLNKVADMVPVDLTVNAILASAWHAAKNFKE  
NQTSDIPIYNFVSGAQNPWKFIELNRKYGIDKPTTKAVWYYGLNPTNSYFMFLFYNNF  
LHYLPALMVDAYCAVTGRRRAMLKLYSKVMKMANILFYFSTRDWRFSDRGVRAMWASL  
SEADRAVFPFSMGDMSWDRLCETFLIGLRVYLIKDDLSTLPEARKKWNRLFYLHQLLKVV  
TFALVLNLAYLVLRPILSLVFGL

>*OnubFAR5*

MAPLLDSTPGDDAAFKIPAMAYSNDNDNDASLKTDDNNNDIDTRNNVELTQIQKFYNGKNI  
LITGATGFLGKILVQKLLRCCPGVENLYLLVRQKRQKDIYTRIEEIFDDPVFDRLKKEEVPKF  
RHKIVVIPADCEAAGLGLTSLDRQTLTEKVNVIHSAATVKFDEQLRLAFNVNVKASLHVL  
RLARDIKGLDVLHISTAYSNSHLDQVEEKFYPCNMDLETNLQTIKMTDEEINSQLSKLL  
GEYPNTYTMTKALAENELRINSKGIPLAIFRPAVVVSSAKEPVKWCWLDNMNGPNGIVVGS  
GTGILRTLQCDMQGTADPVPVDMVNVNCLMAAAVNVNAAYAQSNPPPEPPIFNYVSSVEN  
KITWGEFMTLNMEQVDKYPFSNAVWYISLRLTKSWLLNRFYMFHLHLPVLMMDGLTVCV  
GKKPKMLKVYKKIHKFSDVLSYFCTKDIEFCNRRTQELWQKTSEEDKQLFPFSMAELDW  
RDYFQDYLLGIRRYLFKENDDNLPQARIKWKRLYYHQLVTMLFYFLALYALWSTFSSFL  
L

>*OnubFAR1*

MGFLEERNFEDVPEIPEYYKGKTIFITGGSGFMGKALIEKLLYSCSDDLRIYLLLRTKKGVK  
AEDRLAELYSTGCFDRLREEKPDIFSSKVFFVAGDVMDPGLGLSEEDRALLVNRVNIIFHV  
AASVRFDDPLPFATKLNLGGTKEVVTLAKEVRNLSALVHVSTVYSNTNRDVIEEVMYPPH  
ADWKDTLEVCDVIDEHSRLVTPKYLGDIPNTYTFTKQLAEHVVEYEQKGQLPAVIIGPSIVI  
SSVEEPVPGWIENFNGPVGMLVACGKGIMRSIYTDPNLISDYMVPDVSISIVTAAWIRGT  
KKLEPPDDVQIYNCCAGKLNITMQELVDIGKRLAASLPLNDTLWNIGGSITTSRTIHYIKV  
LILHCLPAIFVDAILLLLGGKPLLLKVQRRYIANLALRYITKEWTFDNTNFIQLRSRIKEQ  
DKKHFFYYDIENVDKKEYFRKSCIGGRKYLLKEKDEDLPKAKAHHKRMVILDKTVQCIFY  
GYLFWVWNTHYIKGLTDFLYEIFTM

>*OnubEpgFAR*

MSANTMETDEQFTYNSPIVNFYSGKSVFVTGATGFLGTVLVEKLLFSCCKGINNIYILIKQTE  
DLTIEARILNYLNSKAFHRVKNTNPPELMKKIIPICGNLEDKNLGISDSMDKTLLEEVSIVFH  
VAAKLLFKMSLTAAVNINTKPTEQLIAICKKMRRNPFIYVSSAYSNNVNEQIIDEKVYNTGV  
PLETIYDTLDTENTRITDIFLDKRPNTYTYSKALAEVVVEKEFDESAAIVRPSIIVSSIREPIP  
GWLSGSHGFPRVVGAAACKGLLLRWHGDGTVCCLIPVDHVNLIHAAWESNERRLMGN  
KGVKVYNCCSSLRNPIDVITVVKTCIKYRKYFGTRTMSIFTPRFIMKKNYFIYKLLYFTYHT  
IPAAIIDGFFWLTGRTPIMLKTLDKLGKISSVLEYFTHHQFIFLDSNVRGLLRRMEGTDRQT  
FNFDVTEIEWEPYLQNFVRGIANNYDYSM

>*OnubZpgFAR*

MSANTMETDEQFTYNSPIVNFYSGKSVFVTGATGFLGTVLVEKLLFSCCKGINNIYILIKQTE  
DLTIEARILNYLNSKAFHRVKNTNPPELMKKIIPICGNLEDKNLGISDSMDKTLLEEVSIVFHL  
AAKLLFKMSLAAAVNINTKSTEQLIAICKKMRRNPFIYVSSAYSNNVNEQIIDEKVYSTGVP  
LETIYDTLDAKNTRLMDIFLDKRPNTYTYSKALAEVLVNEFDESAAIVRPSIIASSIREPIP  
GWLSGSHGFPRVVEAACKGLLLRWHGDGTVAFGIIPVDHVNLIHAAWESNERRLIGNK  
GVKVYNCCSGLRNPIDVSTVMNTCLKYRKYFGTRTMSIITPRFIMKKNYFLYKLLYFTYHT  
IPAAIIDGFFWLTGRTPMMLNTLHKLRKLSSVLEYFTLRQFLFLDSNVRGLLRRMEGTDRQ  
TFNFDVTEIEWEPFLQNCVRGIANNYD

>*SexiFAR1*

MAVETLTEHQLFEAKQGGDITYKDMVEESQPLGDSQIQKLFAGSSVLLTGGTGFLGKLIVE  
KLLRSCPDLLKIFLLARPKKNKTITKRLQEQQFDDVLYDRLRKECPDFINKISLVEGDVGQL  
DLGMCPEDEKIMNEVEIIFHGAATVRFDEPLKTAVEINVRGTREMFKLARGCSKLKAFVH  
ISTAYSNCNQNMIGEEFYESPLPGDKLIDLVTMEEKVINNITPGLLGDFPNTYAYTKAVAE

NIVKEYSKGLPVALFRPSIVIGTSKEPVSGWIDNVYGPTGVVVGAAGLLHVLNCNPKVIA  
DLVPGDMVVNACIATAWKTAKEYPSNHEDAPPPDLTPPVYNYVSSEQRPLTWEKFMNYN  
EVYGFQVPTVQAIYYLFLHLTSSKFLYNLYCFLHWPAYIIDGIAVIIGKKPMLRKAYKKIT  
KFSEVMAYFATREWKFDNTNTQQLFKELCDADKYMFD FDMSSLEWNEYFYNYIRGVRV  
YLLKDPVETVPQGLKKHNRLKYLHYTF CAILGLLFLRLLWAIFSGIFSF

>SexiFAR2

MTYRQINEFDAEKFTAAAVPTSYSVSPDFYAGKSIFITGGTGFLGKVFLEKLLYSCKD VET  
VYILIREKKGKTPQQRVEDL FNKPIFSRLKQKDSQCMKKVTAIIGDLSEPGLGISKDDEELL  
LQKVS VVFHVAANVQFYKEFKEIINTNVGGTKYVLQLCQRIKDIKAFVHISTAYCHTDQK  
VLEERIYP PPAELSEVLKFLQQPQHDKKQIKELFKKQPN SYTFAKALAETYIAENCGRVPTII  
IRPSIISASLKEPLPGWVDSWNGATGLITASYNGANRVLLGEGGNFLDLIPVDFVANLAIVA  
AAKCTSSLKVYNCCSSGCNPLTLKQLVSHMNNVGFDKNVSIIFTN NKASLSTLTFFLQ TTP  
SFTADMFLRV TGKSPRYMKIQSKLTIARNALNFFTCHSWVMKADNSRRLYASLSLHDRHT  
FPCDPTDIDWKYITIYIEGINQFLMKRS

>SexiFAR3

MVVLTSKEKSNMSVADFYAGKSVFITGGTGFLGKVFIEKLLYSCPDIDKIYMLIREKKGQSI  
RERLTKIVDDPLFNRLKEKRPGLDKIVLIPGDVTV PGLGISDENEAILDKVSVVIHSAATV  
KFNEPLATAWNVNVEGTRMIMALSRMKRIEIFIHISTAYTNTNRAVVDEVLYPPPADINEV  
HQYVKN GITEEETEKILNGRPNTYTFTKALTEHLVAENQAYMPTVIVRPSIVGAIKDDPIRG  
WLANWYGATGLSVFTAKGLNRVIYGQSSHVVDLIPVDYVANLVIVAGAKTYRSNEVTIYN  
SCSSSCNPITMERLVGLFIDDTV KHNSYVMPLPGWYVYSNYRWLVYLVTIIFQMIPAYLADI  
GRRLLGKNPRYYKLQSLVAQTQEAVHFFTSHTWEIKSKRTSELFASLSHTDQRMFPCDAK  
KIDWTDYITDYCSGVRQFLEKRK

>SexiFAR4

MCHTYCFYYIKKLIMAPSMNIAEYYAGKTLFITGATGFMGKVMVEKLLRDCSDVKKMYL  
LMRPKKGHSSKERLDDILSFRIFDRLKAENPKLFEKLQV VAGDILSEDGLSPEDRLLIQEE  
AQIIFHCAACVRFD MFLRDAVKMNTMGTKKVLELAEGVKNLQAFVHVSTSYCRCELPFE  
EKLYPSKHRPEHVMHCNVWMDDELLGHLQPKIIEPQPNTYAYTKSLTEDLVSQYEGKFPIV  
IARPSIVAAAYKEPLPGWVDNL

>SexiFAR5

MPTPLAVWYTFIINTSNKPLFFLLTWLLHYIPGYILDAGCILLGKPTMFIKLYNRVNRSSLAL  
SYFTSRTWVFN DNNSDKLFQSLSKSDKLIFNFDTTDINIPEFVTIWCVGLRKLYLMKDG IKN  
TEYARKKQ

>SexiFAR6

MVPRPAPQFPTPPLIPEYFAGREVLITGATGFMGKVLVERLLWTCPDIGRLHLLMRHKRDV  
APDKRLALLKQSQVFDVVRERCPQLDKLCMVPGDVTKRRFGFDQSALNQLNQVS VVF  
HSAATLKFDEPLSVAAEQNVRPVLTLMDICDQLPNMQVLVHVSTAYSNAELAEVEERVYP  
APVTPEHLLALVDALPASMLQEITPRLIAPKPN TYTFTKAVAESAVSERAVTARYACAIFRPT  
IVVSSLRHPFPGWIENLNGPSGVVAGAGKGLLRVLR CGAQRRADMMPVDICIDTLIAVAW  
ETGIDNLREARVYQCASSSHAATWGQFRERMLRLVREHPFDNVLWYPYGVICENTVVQK  
VLEAVLQTAPLCVAHCVARACGLKQKPSLWTACKRLQAMNQALQFFATRHW SFRTTRVQ  
QLAHLRHPDDQKLYNLRPETIDWEQHCVDFVKGARRYLLRERDDDIHAARRRM RILYLIH  
KATLLFAIFTMCRLTIRTAPAILWGVAALTRQRNKSALLS

>SexiFAR7

MANPTIRDFYRGRNILVTGGTGFMGKVLIEKVLYSIPDVGNIIYILMRPKRGKSVAQRIEDM  
QRLRLFERRSEKPDALKKMKPLQGDVLFENLGLSDSDIEKLSNEVSVVHFHAATLKLEAP  
LKDNVNMNTCGTQRALEIAKKFKKLDIFVHLSTAFCDYEVLGERCYGPVVRPENVMK  
LIQWLDDKQLALLTPSLLGHPNICYTFSKRLAETIVEQAHDLPVVIARPSIVCPSVAEPM  
GWVDNLNGPVGVMLGAGKGVIRTMCDGLIAQVCPVDIAINAIIGMIEGNRKEKHTT  
LPVYNVNGHQKPTTWGDVLTIAKDYGRKYPLSWPLWYPNGDITNAVLHEYRRIFYHL  
VPAYLIDFLLFLLGQKRIMIRIQERISQGLEVLQYFTMRPWNFPCPNYDAIKEKLSPEEQVIF  
NTDITDADRDEYMKMCVEGGRVYCFKEDPTKIPYNRIYHRFLYVLDWVFKIMFWLFLVLS  
YLASFWEPIKTLFSLGEPVVKHLPFLGKVCKTEEL

>SexiFAR8

MASETISSAELECLPDRIADTFSGMKVLITGGTGFMGKVLVEKLLRKCPDIEQIYLFVRAK  
KGKNPKQRLEEIFSGPLFEKLRDMRGGVEPLLAKMTIVNGDVSEPDLGMSPEDRQMIINQ  
VDIIHAAATIRFDEELKKAVLLNVRGTKLMVELGKACKNLKVFIHISTAYCHLEKLLEEK  
PYPPPADPHQIIQAVEWMDEETIANMTPKLLNKLPSYAFTKALAEALVVEAMEKANLPA  
MVLRPSIVIPWQEPVPGWTDNINGPTGLLIGAGKGVIRSMYCKSNSYADYLPVDVFINGI  
MIVAWNYLKNKGDKKCNINFTSSAEIKVTWSEMIDAGREIIMNRVPLNGVVWYPGGSMDK  
SRMYHNICVFFFHWIPAFIITLLFCLGYKPVLCRVQRRITKGFEVFEYYTNNQWDFKSDIA  
QTLRQKLNAKERRDYKVDVGLDISKYFEDCIRAARIFILKEYDDTLPAARRHMRIMYWV  
DVIVNCLFWGFLLYWLSGWMTTSKAIVPDTATPTVIAMDA

>SexiFAR9

MNTNFESTKKLLELSQRMKNIEVFLYISTAFTHTQKKVLVETVYPPPAKVEDIYKFIEENG  
DEQATLKFINGQPNTYTFTKSLSEAYLSKHHGNVPAVIRPSIVSATNQEPGWLNDWYGS  
TPFLMNASEGWLRIVRGNYSIDFIPVDFVTNLSIVAAAKAKRTNEVQVFHSTTSADNPT  
DWSDFKNYFLDEVVRRGKNDLPYPNIVFVESKIALAIGSFLMQTPAHMLDLWLKITGKE  
PRYVKILAQVIRLRDSYEHFSSNDWIMRSDRTRQLHASLSPEDQEKFCQDPTQINWPEYK  
DYCRGVLYLKPRKMY

>SexiFAR10

MNYTAEKSPLSQTPVTREKMDKWVDAQVKGEKLDIDVYGKPTDKMLKELENVRNLSKE  
LQDNLHELENSVRIAEVENQAMNPTAQILDFSEDHEFVPDNKDTYYAEEDKLDKEEEEK  
KLTKGKGPKTEIQEFYKDQCVFLTGGTGFLGKVLIEKLIRSCGDINTIYVLARNKKGKDPR  
VRLHEMMDEFLFHRAHEENPKGIHKVVPILGDMELPGLGINEEDRKMLASKVTIINAAAT  
VKFDEKLSVSTAINVKGTKEVLKLAKECRNLKAITHVSTAFSNTQVKHIEEFYEPMSVE  
ALEAISEVDEKLVESILPTLLGSRPNTYCFTKAVAEAVRTYGEGLPICIVRPSIVSTYEEPV  
RGWTDVYGPGLVVGIGTGVLRTMYMDQEKVADMVPVLDLCVNAILASAWHTAKNYK  
ENQTSPIPIYNFVSGAQNPLTWGEFIERNRKYGIDKPTTKAVWYYGLNPTNNYYLFLFYNF  
FLHYLPALMIDTYCAITGKRRAMKLYSKVMKLANILFYFSTQDWKFSMDNVRNMWNS  
LSDADRVIFPFSIGEMSWEYMCETFLVGLRVYLIKDDLSTLPEARKKWNKLFYHQLTKAI  
TSLSVVYLYFVLQPIIALVFN

>SexiFAR11

MASEVNEWYKGRSVLVTGALGLMGKVLIEKLLYSVPDVGCYALVRSKRGKSPETRIE  
MWKLPLFKRIEEKPHVMKKLIPVTGDIMYDELGISAENLNKIYNEVSIVFHAASLRLEA  
PLKEGLEMNTRGTLRVLEMAKKMKSLVAFIHLSTAFCDYERMAEKVFDPPPTDPHEVLR  
AASWLTEEQLNLLAPSIYQKHPNSYTYSKRLAEALVRESYPNLPAVVVRPSIVTPSYKEPT  
GWVDNLNGPIGLMVGAGKGVIRSMHCYGHYAEVIPVDIAINSIIVIAKYTGKDTERRQPEI

PVYNLTGDDRNTTWKEVLDIGKATVRKFPFEGPLWYPDGNIRHNKFIHDLCVFFYHIIPA  
YFIDFLMFLFRQKRFMVRIQNRISIGLEVLQYFTTREWTFDTNNYKSLVHLLNPVDKETFP  
MDTTIEDEPYIESCMIGGKLYCLKEKLENLPKARLQNHILYILDRLVSLFFYLVLVLYWIVSY  
FEPARELLSYGGPAVRYLPLVGKAVFKDV

>SextiFAR12

MADPSQVRSFYAGKNFFITGGTGFVGLCLIEKILRCIPDSGKIYLLMRPKKGKEIADRLQEF  
PKNPVFEKLLSNSTDVFNKLIPIAGDVGEENLGMSPQDRQTIINNPNVVIHSAATLDFQE  
NLRPTVNINLLGTRRVMQLCKDAKNLKVMIHVSSAYVNSYLTEAHEKIYEAPEDPEKVISL  
VGTLNDEALLEIEPKLLKSHPNITYTFTKHLAEHEVVKCADLFPCTIVRPTMIVASWKEPIPG  
WTCSKVGPQGFLMGAAKGVVRRPLAKENVADYIPVDVVVNQLLVAGWEAANSSSGLT  
VYHCSSSTCHPFTWTMLDDTVNGMLHKYPLKSAVWYPHLKFVPSLLMFRISAIFVHFFPA  
LLLDLMLRMTGGRPILIRLHKNVWNSLNRLERFIFSEWKFNPNNTLELATKLNQTDKELFF  
IDISKLYWVEYFKTLHLGVRRYLNKEKESTLPAARKKDMVLLLHFVMWQLFIMGLVWYI  
FACATGLTLAHSWVAPIIYILFTFL

>SextiFAR13

MAPNVKEYYRGKNIFITGGTGFVGKALLEKLLRNCSEVNAIYLLMRQKKGVSAEERLKD  
LCSKPVFDMVREKNPSSFKKLMINGDITEAGLGISEDVVKLLQKECNIIHFHSAACVRFDQ  
KLKDAVNMMNTTGTLRMLTLAESMQNLEVFVHLSTAYCRCDLDVLEEKVYTAVHKPRKIM  
DIVEWMDDETLAYLEPKIISSEPNTYSYTKAITEDLVNEYSKGFPPIAIARPSIVTAVWKEPIP  
GWVDNLNGPTGIVIGSGKGVIRTMHCEPSYKADAISVDVVANACILIAVVTGLDKPKETQ  
VYNLTLSGVINLTWQEIIDLGEKWVNEFPYTMALWYPGGSIKSYRITHQIDKFFSHLVPAYL  
VDALLFLLGKKTFFMINLQKRISHGLNVLQYYTTKEWHFRNNNYKGLRNRVTPEDNEVFY  
TDASTLDPDEYLKNYVLGTRKFCCNEDPANLPRARKLHRIRYMADRFFKLLFIFLILWTLY  
SNSHVFTSSVELLDNSLKSPLMNQANAEESNIAL

>SlitFAR1

MAAETLTENQLFEAKQGGDITYMDMIEETQPLGDSQIQKLFAGSAVLLTGGTGFLGKLVV  
EKLLRSCPDLLKIFLLARPKKNKTITKRLQEQQFDDVLYDRLRKECPDFINKISIVEGDVGQL  
DLGMCPEDEKIMNEVEVIFHGAATVRFDEPLKTAVEINVRGTREMLKLARGCSKLKAFV  
HISTAYSNCQNMIGEKFYESPLPGDKLIDLVTMEEKVINNITPGLLGDFPNTYAYTKAVA  
ENIVKEYSKGLPVALFRPSIVIGTSKEPVSGWIDNVYGPTGVVVGAAGVLLHVLNCNPKV  
KADLVPGDMVNVNACIATAWKTAKEYPSNHEDAPPPDLTPPVYNYVSSEQRPLTWEKFMN  
YNEVYGFQVPTVQAIYYLFLHLLTSSKFLYNLYCFLHWPAYIIDGIAVIGKKPILRKAYKKI  
TKFSEVMAYFATREWKFDNSNTQQLFKELCDADKYLFDFFDMSALQWNEYFYNYIRGVRV  
YLLKDPVDTVPEGLKKHHRLKFLHYTFGILGLLFFRLLWAMISGILSF

>SlitFAR2

MLWVDFSVSLNLDKIFATMVPRPVSPSPAEPLIPRFYAGRSILITGATGFMGKVLVERILST  
CPEVGRLHLLMRDCKGHSPQKRLAQLKQSQVFDNVARNHRQLDKLCVVSQDVSKPQL  
GMDADAIAQLREVSIVFHSAAATLKFDPELPVAIDQNVRSVERLLDICDKLPNMEAFIHVST  
AYSNAELTVVEERVYPAPVPLAQACTLAETLPVDLLGQINTQYISPKPNTYTF

>SlitFAR3

MVVLTSKEKSNMSVADFYAGKSVFITGGTGFVGKVFIEKLLYSCPDIDKIYMLIREKKGQSI  
RERLTKIVDDPLFNRLKDKRPGDLGKIILIPGDITVPGLGISEENETILIEKVSVVIHSAATVK  
FNEPLATAWNVNVEGTRMIMALSRMKRIEVFIHISTAYTNTNRAVIDEVLYPPPADINDVH  
QHVKNQVTEETEELKILNGRPNTYFTFKALTEHLVAENQSYMPTIIVRPSIVGAIKDDPIRGW

LANWYGATGLSVFTAKGLNRVIYGHSNHVVDLIPVDYVANLVIVAGAKTYHSNEVTIYNS  
CSSSCNPITMKRLVGLFIDYTVKHKSVMPLPGWYVYSNYRWLVFLVTLIFQVIPAYLGDI  
GRLLGKNPRYYKLQNLVAQTQEAVHFFTSTWEIKSKRTSELFSSLSLTDQRMFPCDANR  
IDWTDYITDYCSGVRQFLEKIK

>*SlitFAR4*

MAPSVNIAEYYAGKTLFITGATGFMGKVMVEKLLRDCSDVKKMYLLMRPKKGHSSKER  
LDELLNFKIFDRLKAENPKLFEKLQVVAGDILLEDLGLSAEDRLLIQEEAQIIFHCAACVRF  
DMFLRDAVKMNTMGTKKVLELAEGVKNLEAFVHVSTSYCRCELPLFEEKLYPSKHRPEH  
VMHCVNWMDDLELGHLPKIIEPQNTYAYTKSLTEDLVSQYEGKFPVIARPSIVAAAYK  
EPLPGWVDNLN

>*SlitFAR5*

MDPALAVELEALSQRQKAMFEATERGDSTVQQFYKDSTVFLT GASGFLGKQLVEKLFACN  
IRKIFILLRPKKNM TIQERLEEM LQDPVFNLVKKKKPDF AENIVPVKGDVAETKLGLSDTD  
WTMITSEVDVIFHVAATTRFDEALRVSTMINIRGTRETVLLGKDCQKLKSFVYVSTTYSTA  
TQANVDKEVMERFYPCPLPPELMIDMAENIDDERMEAIEANLIKGYPN TYTFTKSIAEEVV  
RSLAGEMPTCIIRPAVVISSYREPVPGWADASCAFGASGLILGPATGLIHAIYASNDVKFSLV  
PVDYVNNAILVAGWHTATEKPNDVQIYSVSSARNLFHWEPISSKIRDIGKVLPTPLAVWYT  
FIINTSNKPLFFILTWLLHYIPGYILDAGCILLGKPTMFIKLYNRVNRSSLALS YFTTHTWVF  
NDSNTDKLFNSLSKTDRLIFNFDTS DINISEFVTLWCVGLRKYLMKDG IKNTEYARKKQFL  
LKYLHYVVSFMYVYVLFKITCLVCYLILCLFG

>*SlitFAR6*

MVPRPAPQSSTPPLIPEYFAGREVFITGATGFMGKVLVERLLWTCPDISRLHLLMRHKKDC  
APDKRLALLKQSQVFDVVREQCPQQLDKLCVVPGDVTKRRFGFDQPTLNQLNQSVVVFH  
SAATLKFD EPLSVAVEQNVRPVLT LMDICDQLPNMQVFIHVSTAYSNAELSTVEERVYPAP  
VSPSHLLALVDALPATMLQEITPRLIAPKPNTYTFTKAVAESAVSERATSAHYACAIFRPSIV  
VSSLRHPFPGWIENLNGPSGVIAGAGKGLLRVLRCGAQRRADMMPVDICIDTLIAVAVET  
GVDNLREGRVYTCASSCHAATWGQFRARMLRLVREHPFDNLWYPYGIICENTVIQKVL  
ETVLQTAPLCLAHCVWRACGLKQKPSLWTACKRLQAMNHALQFFATRHWSFSTTHVQK  
LADRLHGEDKLRYNLRPETIDWEQHCVD FVKGARRYLLRERDDDIHTARRRMKLLTVIH  
NATLLFAIFFVCRLTIRTAPAILRGVAVLTRLRNKA IQES

>*SlitFAR7*

MSNPSIRDFYKGRNILVTGGTGFMGKVLIEKMLYSIPDLGNIYILMRPKRGKSVAQRIEDM  
QRLRLFERIRTEKPD AFKKMKPLQGDVLF DNGLGSDSDIELLCNEVS VVFHFAATLRLEAP  
LKDNVNMNTCGTQRALDI AKKFKKLDIFVHLSTAF CYPDYEVLGEKCFGPPVKPENVMK  
LIQWLDDKQLALLTPSL LGPHPNCYTFSKRLAETIVEQA HDELPVVIARPSIVCPSLKEPVP  
GWVDNLNGPVGVM LGAGKG VIRTMLCDGSLTAQVCPVDIAINGHIAIGMIEGNKKEKHTS  
LPVYNVNNGHQKPTTWGDVLTIAKDYGRKYPLSWPLWYPNGDITTN AVLHEYRRIFYHL  
VPAYLIDFLLFLLGQKRIMIRIQERISQGLEVLQYFTMRPWNFPCPNYDAIREKLSPEEQEIY  
NTD TTDVDRHEYMKMCVEGGRVYCFKEDPNKIPYNRIYHRFLYVLDW FVKIMFWLFLVLS  
FIASWCGPIKTVFSFGEP IVKHL PFLGKVVS KVEEL

>*SlitFAR8*

MASETISAELECLPDRIADTFSGMKVLITGGTGFMGKVLVEKLLRKCPDIDQILLFVRSKK  
GKNPKQRLEEICSGVLFEKLREMRGGVEP LLEKVTLINGDVSEPDLAMSPEDRQM IIDQV  
DIIHAAATIRFDEELKKAVLLNVRG TKLMVELGKACKNLKVFIHISTAYCHLHEKLL EKA

YSPPADPHQIIQAVEWMDEETIATMTPKLLNKLPSYAFTKALAEALVVEAMEKANLPAM  
VLRPSIVIPIWQEPVPGWTDNINGPTGLLIGAGKGVIRSMYCKSNSYADYLPVDVFINGIMI  
VAWNYLKNNGDKKCNIIINFSSAEIKVTWSEMIDAGREIIMNRVPLNGVVWYPGGSMKHSR  
LYHNICVFFFHWIPAFIIDTLLFCLGYKPVLCRVQRRITKGFEVFEYYTNNQWDFKSDIAQT  
LRQKLNAKERRDYKVDAVGLDISKYFEDCIRAARVFILKEYDDTLPAARRHMRIMYWVD  
VIVNCLFWGFLLYWLSGWMTTSKAIVPDTASPTVIAMDA

>SlitFAR9

MHCNENYEADVVPVDVTVNACIILGYLTGMEKPKKINFCNITQSQINPITWGQALDMGRV  
HVQEFPFTVCLWYPGGSASWIAHQFALFFTHMLPAYFVDLLMFLMGKKTFMIKIQKRI  
NYGLEVLQYYTTKEWHFTNDFFVSLQNRISKRDNEIFYTNMKEMDWSQYIRNYIRGARE  
YCKKEDPSTLPAARRLQKQLYYLDKAVQIMVGLLVSYFIYYFNMLYSSMISS

>SlitFAR10

MNYAIEKSPLSQTPVTREKMEKWVDAQVKGEKADIDVYGKPTDKMLKELENVRNLSKE  
LQDNLHELENSVRIAEVENQAMNPTAQILDSEDFEVPDNKDTYYAEEDKVDAKEEEK  
KKLTKGKGPKTEIQEFYKDQCVFLTGGTGFLGKVLIEKIIRSCGDINTIYVLARNKKGKDPR  
VRLHEMMDEFLFHRAHEENPKGIHKVVPILGDMELPGLGINEEDRKMLASKVTIINAAAT  
VKFDEKLSVSTAINVKGTKEVLKLAKECRNKKAITHVSTAFSNTQVKHIEEFYEPMSVE  
ALEAISEVDEKLVESILPTLLGTRPNTYCFKAVAEAEAVRTYGEGLPICIVRPSIVVSTYEPPV  
RGWTDVSYGPTGLVVGIGTGVLRTMYMDQEKVADMVPVDLCVNAILASAWHTAKNYK  
ENQTSHIPIYNYVSGAQNPLTWGEFIERNRRYGIDKPTTKAVWYYGLNPTNNYYLFLFYNF  
FLHYLPALMIDTYCAITGKRRAMLKLYSKVMKLANILFYFSTQDWKFSMDMVRNMWNS  
LSDADRVVFPFSMGEMSWEYMCETFLVGLRVYLIKDDLSTLPEARKKWNKLYYLHQILKI  
ITLSLVLYLTYFVLQPIIALVFN

>SlitFAR11

MSTEPGDGPLLPGFYAGRAVLITGGTGFLGKVLIERLLWTCPEVGEVHLLLRDKRGQPPRV  
RLNQLKQSQAFDNVRAHCPGQLDKLRVVCGDVAQPRLGLDDAALLQLREVSLVFHSAAT  
VKFWESLETALHQNVTSVVALMELCDQLPRLEALVHVSTAYSNAERRHIEERVYEAPACL  
AGLRAMLDALPPSLDDLTARYIAPKPNTYVFSKAVAEATIAQRPRKHYATAIVRPSIVVSS  
HRHPYPGWENLAGPSGVVVGCGKGLVHAFNLDLAARADLIPVDITIDTMLAVAWEIATD  
KSEEVRYNSCSQQNPITWGTFRDRVRNARAHFPDQLMYYPFTFGIKNRYVYKALELVL  
QTIPLYVADYIARLCGIKLQLSLVTVSERLQAMNRVLAFFATREWFSTRNVQALRRRLTR  
ADQDIYNLDVTSVDWDEHVSNFVKGTRKFLLKEKDDNIPRAKKFVERLRRVHQFVLLML  
SVLVYRFLMLLLPRFLRSSPVLAGLAAPH

>SlitFAR12

MADPSQVRSFYAGKNFFITGGTGFGVGLCLIEKILRCIPDAGKIYLLMRSKKGKEIADRLQEF  
PKNPVFEKLLESNSADIFKKLIPIAGDVGEENGLSPQDRQTIIDNVNVVIHSAATLDFQESL  
RPTVNINLLGTRRVMQLCKDAKNLKVMIHVSSAYVNSYLTEAHEKVYEAPEDPEKVISLV  
GTLNDEALLEVEPKLLKSHPNITYFTKHLAEHEVVKCADLFPCTIVRPTMIVAAWKEPIPG  
WTCISKVGPQGFLMGAAKGVVRRRLPLAKENVADYIPVDVVVNQLLVAGWEAANSRSGLT  
VYHCSSTCHPFTWTMLDDTVNSMLHKYPLKSAVWYPHLKFVPSLLMFRISAIFVHFFPA  
LLLDLMLRMTGGRPILIRLHKNVWNSLNRLERFIFSEWKFNPNNTLELATKLNQTDKELFF  
IDISKLYWVEYFKTLHLGVERRYLNKEKESSLPAARKKDMVLLLHFVIWQLFIMGLVWYIF  
ACFTGLTLAHSAWIAPIIYILFTFL

>SlitFAR13

MAARADMLPVDMAIDTLLAVAWETAVIDRPEAVRVYNCSTCENPTTWDRDFETALRHRLRV  
NPLDNAFWYPSGFTVENKLTQKTLETILQTAPLHIAEYISKILGIKTRLSLITVSQRLIAMNE  
VLRFFSVREWHFVTDNVRKLHARLTPQDAAIYNLDPQTINWNEHYCNFIIGARKYLLQEK  
DQDINEAKKHLRRMYYLHHGVMFFVVTLLCRLALRNQYLRAFIYRTFRMLLTVAGSAYM  
RIRQS

>*SinfFAR1*

RLKEERPNDLNKVIPIAGDINLLDLGISAKDEEILIQKVSVVFHIAATIRFTEELKDAVNVNV  
TGTKYVLQLCQRMKNIAFVHVSTAYSNPEKHILEEKMYPPPAKLTEVQTFLDQSIDSNQ  
IKALLKGAPNTYTFTKALAETYVAENYGNIPTVIIRPSIVSASLREPL

>*SinfFAR2*

MVVRATGDAEKPSVAEFYAGKSVFITGGTGFLGKVFIEKLLYSCPDIKVFMLIREKKGLSI  
SERMNQFLDDPLFNRLKDKRSTDLLKIVLIPGDISVPGLGISREIENILLETVSVIIHSAATVK  
LNEPLPTAWKINVEGTRSVVALSKRMKRIEVFIHISTAYTNTNRKVVEEILYPPPADINEVYQ  
LLEDGITEEDTERLLNGRPNTYTFTKSFSEHVVAENQVRVPTIIVRPSIVGSVKDHPKRWL  
NNWFGATGLSVFTARGMNRVLYGRSSNVVDLIPADYVANLVIAAGAKSGNEKSSELKVY  
NCCSSSCNQITLGTVMMAKFTEDAVNQPSDMLLPGWYVFTRYKWMMTVWTILLQVIPAY  
LADTYRILTRKNPRYVKLQSLVAQTQTALRFFTFNSWVMKADRVRELFASLSPADKDIFPC  
DPISIDWNEYIKDYCCGVRQFLEKRR

>*SinfFAR3*

METVEQISAYESVAGFYAGKSVFVTGFTGFLGKVFEKLLYSCKDIGDVYVLIRAKKSKDI  
KQRLEETFNKPLFARLKEERP

>*HassFAR*

MVVLTSKETKPSVAEFYAGKSVFITGGTGFLGKIFIEKLLYSCPDIGNIYMLIREKKGLSVSE  
RIKQFLDDPLFTRLKEKRPADLEKIVLIPGDITAPDLGITSENEKMLIEKVSIIHSAATVKFN  
EPLPTAWKINVEGTRMMLALSRRMKRIEVFIHISTAYTNTNREVVEILYPAPADIDQVHQY  
VKDGISEEETEKILNGRPNTYTFTKALTEHLVAENQAYVPTIIVRPSVVAIKDEPIKRWLG  
NWyGATGLTVFTAKGLNRVIYGHSSYIVDLIPVDYVANLVIAAGAKSSKSTELKVYNCCSS  
ACNPITIGKLMSMFAEDAIKQKSYAMPLPGWYVFTRYKWLVLTLILFQVIPAYITDLYRH  
LIGKNPRYIKLQSLVNQTRSSIDFFTSHSWVMKADRVRELFASLSPADKYLFPDPTDINWT  
HYIQDYCWGVRHFLEKKTNNK

>*AperFAR1*

MNNNSHINLETSREVDTDVVSSENDEYESVADFYSVGKSVFITGATGLLGKVCVEKLLYTCT  
NIDKIYILIRDKKGLHIDQRMASFFEQPVFSRIKREKPDVLKKVIPISGDITADNLGLKLEDE  
QLLIQTVSVVIHSAATIKFNEPLKIAFNINVEGTRRVLNLAKRMHNIKVFVYVSTAYSNTNQ  
KILDEIYPPSIELDELKHIIAYQHIRGDDEVELKKLLKFHPNTYTFTKSLAENLVAKEHGDL  
PIVIRPSIITASEKEPISGWIDNWGGATAITFIMNGWNKMYLCDGNIYLDMIPVDYVTNLIL  
TSAACKCYRTKSVQVFHSCTSSENPIVNEMLNLTNRVYNEKRNIDSKSIILTRSKFLVTCLTLII  
HTIPAYVADLWMRACGKKEKYVKLHFQIVAHRALEYFTTNSWVMRCGGTSLFNSLNV  
CDRQLFPCDPRDIVWTEYMDTYVSGIFKYLLKE

>*AperFAR2*

MNIMSDKINKEEFYQPVAEFYEDKSVFITGATGFLGKVLLERLLWNCPKIDKVYVLVREK  
KGVSVDRRIEELLDNVLFSLKLDNRPDLLKKIPIPGDIAVNNLGMNDADENTLIEKVAIVI  
HTAASIKFKNPLKESLKINLEGTNQILNLCHRMKKLEVHVHTSTAYTNTDKKVIEEIVYPPP  
ANLSDVYVLQLEQNLEDEFTKVLNGQPNTYTFTKALTENLIMDRNRNLTTILIRPSIVTAVAN



EPLPGWIDNWyGASATLSSISKGINRILWGNVDNIVDLIPVDYVANFFLIAIAKGQRSESVV  
VYNCCSSFSNPIRYRGLFRAFVDDAIKHRNYIYPFPQIYFMTTNKIIESIVKIFLEILPAFIADC  
VGWLFNKPTGFLKLQKRIVAKREVIKFFTTNSWMMQDLGARALYTSLSLSDQNQFPCDV  
TQLNWDEYILTYSAGIRKHLENK

>AperFAR3

MTSEVNEWYRGRKVLITGSSGFMGKVLMEKLLYSVPDIGCVYALARSKRGKSPESRIEDM  
WKLPLFSRIREEKPHVMKKVIPVSGDIMYDNLGINKDQLEQIYNEVSVVHFHFAASLRLEAP  
LKEGLEMNTRGTLRVLELSKNIKNLAAVFHLSTAFYCYPDYERMAEKVHDPPEDPHRVLEA  
AGWISDEQFNLLAPSIMKMHPNSYTYSKRLAEALVRESYPELPAVVVRPSIVTPTYKEPIPG  
WVDNLANGPIGLMVGAGKGVIKSMHCYGHYHAEVIPVDIAINAIIVTAYKTGKSTERSPEIP  
VFNITTGDDRNTTWKQVLDIGKASVRKFPFEGPLWYPDGNIRHRSKFIHDLCVFFYHLLPAY  
FIDFLLLIFRQRRFMVRIQNRISVGLEVLQYFTTREWTFDNDNFKSLVTILNPIDQALFPMD  
LTIIEDEPYIESCMIGGKLYCMKEKLENLPRARLHNNILYLLDRLVTALFYLFLLSWVASYF  
EPVRYLLSYGGPVVRLLPFLGKAVFSDD

>AperFAR4

MAKDITTHVDFKKKFEDFTDLDMWEEKSLGESQIEKFFSGTTVLLTGGTGFLGKLFVEKL  
LRCCPDHKLKLYLLTRPKKDKSITKRLQEQQFDDVLYDKLRKERPDFIKKIAIEGDVGAILDG  
MSLKDRNKIVNEVEIIFHGAATVRFDEPLKTAVEINVRGTREICQLARACDKLSLVHISTA  
YSNCVLNEIEERFYESPLPGEKLIDLTVETVDETIINNITPGLLDGYPNTYAYTKGVAEDIVQK  
YSKGLPVALFRPSIVIGTATEPVSGWIDNVYGPTGVVVGAAGVLLHVLNCPNSAVADLVPG  
DMVVNACIATAWKTAKEYPGNHEDAPPPDLPPPYNFVSSVQQPLTWRNFMKYNETYGL  
EVPTVQAVYYYYLFHLTPSRFIYSLYCFHLHWIPAYIIDGVAVLIGRKPMRLKAYRKISKFSEVI  
GYFATREWKFFHNDNVKSlyTELCDADKQMFDFDLSRLDWSDFESYVRGVRIYLLKDPM  
DTIPAGLKHKHYKLKYAHYFLCLVLLSLTLRLFWsILCMVIDF

>AperFAR5

MSEESQIRAFYSGKSFFITGGTGfVGLCLLEKILRCIPDVGKIYLLMRPKKGKEISQRLEEFa  
KHPVFEKLLENKSADIFNKLIPIAGDVGEDNLGINARDRQTLIDNVNVVIHSAATLDFQDN  
LRPTVNINLLGTRRVMALCKEIKNLKVMIHVSSAYVNSYLTDVHEKIYDCPEDPEKVISLV  
GTLNDAALDEIEPKLLKDHPNTYTFTKHLAEHEVVKCAELFPCTIVRPTMIVASWKEPVPG  
WTCSKVGPPQGFIMGASKGVVRRPIAIEINIADYIPVDVVVNELLVAGWHAATTKSGITVYH  
CSSSTQNPFWRWSMLESSTVNGNLHKYPLKSAVWYPHLKFVSSLWLFKLSAIFVHFIPAILLD  
MVLRLTGGRPILFRLHKNVWSSLGLLERFIFTEWHFHNPKTIELSKELNKTDESELFYINIAS  
LNWNEYFTDLLLGVRRLNKEKDSTLKAARNKDTVLLGFHIVWQLVIIAMFWYIPAWIFG  
LTIYQSAWVAPVMYFLYSFL

>AperFAR6

MASCLSFPGSGQEYVPVAEFYADKSIFVTGGTGfMGKVLVEKLLRSCPKIKKIYLLMRPKR  
GQDVASRLNELTQSPLFETIRKERPQELTKIVPIVGDITEPELGISPADQTMLCQKVSVVfHS  
AATVKFDEKLKLSVTINMLGTQQLVQLCHRMLGLEALVHVSTAYCNCERERVEETVYAPP  
AHPEHVVTLVQTLDELVDRIPTDLVGDRPNTYTFTKALAEDMLIKESGNLPVAIVRPSIVL  
SSVREPVKGWVDNWNGPNGIIAAVGKGIFRTMLGTGTriadLVPVDTVINLMIVCAWRTH  
LRRGDGVVVYNCTGQQNPITWQQFVRSSFKYMRKHPFTDVVWYPGGDITSNRLKHGA  
LCLVQHRAPAVIMDFVSRATGNNKPMVMVRVQNKLDKAAACLEYFTTRQWAFADDNVQA  
LCSSLSAEDQRTFDFNVRNIDWDAIESYVLGIRRFLFKESPDTLPKSRALLRRLHIVHILTQ  
VAGVILLWRFLFYRSNALRNIWRRVIDMLTRAARLLAIA

>AperFAR7

MNHSVEDSPLLDTSLTAEKMEKWIEAQRKGEKIDIDVYGKPTEKQLRELEHVRNLSKELQ  
DNLHELENSVRIAEIENQDMNPAPILDFSEDHEFVSANQLENCYDEEDKVDAREEEKRK  
LTKGNAVSTVIQNFYKDQCQVFTGGTGFLGKVLIEKLLRSCVGINTIYVLIRNKKGKDYTT  
RLQELLDEFLFHKAHEINPKGIHKVVPINGDMQLPGLGISDTRKTLTSNVSIINAAATVK  
FDEKLSVSTAINVKGTKEVLKLAKECRNLKAVTHVSTAFSNTHVSYIEEFYEPMTVEAV  
EAISELDEHLLSILPTLLGKRPNTYCFTKAIAEEAVRIYGEGLPICIVRPSIVISTYEEPMRG  
WTDSVYGPTGLVVGIGTGVRTMYMDLDKVADMVPVDLTVNAILASVWHTARNFKENQ  
TSEIPIYNYVSGAQNPWKWRQFIDVNRNGINNPPTTKAVWYYGLNPTNCYYMFMFYNFFL  
HYLPALLIDVYCLLSGKRRKTLALYGKVMRMSNILFYFSTQDWKFEDDGVKAMWNTLSE  
DDKTVPFMSMSEMSWDYMCETFLVGLRVYLLKDDLSTLPEARMKWKNLFAIHLILKLATL  
TFVLYMVYILLRPIFSFVFI

>AperFAR8

MESIMTVRDFYKGRNLLITGGTGFMGKVLIEKLLYSIPDIGNIYILMRPKRGKSSISQRLED  
QRLPLFDRLRQERPSAFNKLKPLQGDVLFDDFGLSSLDIDNLSKEVSVLFHFAATLRLEAPL  
KDNVNMNTAGTMRTLNVARRLKKLVILHLSTAFQCYPDYEVVLGEKLYPPPVPKENVMNLI  
EWLDDRQLALLTPSLLGHPNCTYFSKRLAENVVEQAYNELPVVIARPSIVCPAYTEPLPG  
WVDSLNGPVGVMGAGKGVIRTMCDGSLYAQVIPVDIAINAIIGMIEGLKKDKTETIP  
VYNVNIGHQMPTTWGYVLEVAKDYGQYPLSWPLWYPNGDITNTYTLHEMRRIFYHLLP  
AYVIDFILFLVGQKRFMVRIQDRISQGLEVLQYFTIRPWNFPCPNYDGIQTKLNEEEKIIFNT  
DITNSNRAEYMKNCVEGGRVYCLKEDPTKVSINRSYHNFLYVLDWICKIMFWLFWFSFLA  
SWYEPVSDILKYGEPVVKHLPFLGPAVFKDTN

>AperFAR9

FKGKTVFVTGGSGFMGKVLIEKLLYSCPDVEKIYLLLRSKKGIHSEDRLSSIYSSECFNRLR  
KEKPDIFQSKVSVVNGDITEIGLGLSAEDRHILTDQVNIIFHVAASVRFNDDPMKYAVKMNL  
RGTRVVELAKDIKNLMVLVHLSTSYSNTNREVLEEVMYPPHADWRDTLAVTESFDDHT  
LDVLTPKYLGEPLNTYTFTKQLGEHVMYEQRGRLPIVILRPSIVISSLAEPMPGWIDNFNGP  
VGLLVASGKGVMRSIYTDPNLVADYVPVDVAIKAIITSAWSRGTKQLESTDDIPIYNCCSSK  
IYRVTLGDIHEMGMELSKEYPLNDVLWHVGGNVTNSKTLHYLKVLLHLLPAILVDITLWA  
LGRKPILIKVQRRITYANLALHYITQQWTFDNTNVLKLLESIKDEDKGHFHFIDFYNIDVK  
QFFRKSFFGARKYLLKE

>AperFAR10

SGFVRGRVLILCLFYNNVKNITISMSCEGYSAEEVDSMPDRIADTFTGLTVFITGGTGFMG  
KVLVEKLLRKCPNIGHIILLVRTKKGKNPRQRLEDIFNGELFEKLRNLRGGIEPLLEKVSIA  
GDVGEPDLALSAADRERITNDVDIIHAAATIRFDEELKKAVLLNVRGTKLMVELGKQCK  
KLKLFHIVSTSYCHLHEKLLEEKPYPPPADPHQVIQAVEWMDTETVAALTPKLLDKLPNSY  
AFTKALGEALVVEAMEHMPAMVLRPSIVIPWQEPPIGWTDNINGPTGLLIGAGKGVIRSM  
YCKSNSYADYLPVDVFINGIMIAIWNIVYGDKNINFTSSAEIKVTWSEMIIDAGREIIM  
NRMPLNGVAWYPGGSMKHSRLYHNICVFFFHWVPAVIVDTLLFCLGYKPVLMRVQRRIN  
KGFEVFEEYTNQWDFKSDIAQTVRRRLNTRERRDYKVDAVGVDISKYFEDCIRAARIYI  
LKEYDDTLPAARRHMRVMWWVDLITRIIFWGLILYWISGWFSFSSFTEGSNETPTVLSMD  
A

>AperFAR11

MSPTVAEFYAGKTVFITGGTGFGKVLVEKLLRSCPDVKTICLLMRPKKGYSCEERLHDL

CSSKVFDLVRRDNP GAFNKLKFIDGDITVDGLGISDEDNEMLRSECNIIFHSAACVRFDQK  
LKEAVNMNTTGTLRLLTLAETMNKLQAFIHLSTAFRCCELDVLEEKLYKAVHSPRRIMDIV  
DWMDNDTLDYLEPKLISSEPNTYSYTKAITEDLVAEYGNKFPLAIARPSIVTPAWKEPFG  
WVDNLNGPVGIFVGGSKGIIRSM LCEGSYKADVISVDIVVNACILIA YVTALDKPKATQVY  
NVTLSRAIKISWYQVIKLGEKWVHEYPTLALWYPGGSLKSSRIMHKISVAVTHYLPAYLI  
DGLLYILGKKTFMVKVQKKVSRGLEVLEY YTMKEWNFKNTNFLALRHRVDKSDEKTFFT  
DASECNADEYLRNCVLGAREYCLKEDSSTLPRARTLHKIRYVAD RIMKFISFCLLFWFLYC  
YRDVFLSALELLDCYLKNFTLNPIKAKESCESN
