# Supplementary material for: Genome-Wide Identification and Expression Profiling of Candidate Sex Pheromone Biosynthesis Genes in the Fall Armyworm (Spodoptera frugiperda)
Source: MDPI journal article supplement (doi:10.3390/insects13121078), 2022-11-23
Supplement: s1 [file s1]

Table S2 Primers used for RT-PCR and qPCR

| Primers                         | Primer sequences           | Usage<br>of primers |
|---------------------------------|----------------------------|---------------------|
| <i>Sfur</i> DES2-ORF-F          | ATGGCTCCAGCGCAAAAACACATCC  | Amplificaion of ORF |
| <i>Sfur</i> DES2-ORF-R          | TCATTCGGCGTGACATTTTCTGCC   |                     |
| <i>Sfur</i> DES5-ORF-F          | ATGGCTCAAACCTATACAAACAACAA |                     |
| <i>Sfur</i> DES5-ORF-R          | CTATTCGCCTTTTGTATTTTAA     |                     |
| <i>Sfur</i> FAR2-ORF-F          | ATGACGTATAGACGAGTAAGTGAAT  |                     |
| <i>Sfur</i> FAR2-ORF-R          | TTAAGTATAATTCTTCATCAAAAAC  |                     |
| <i>Sfur</i> FAR3-ORF-F          | ATGGTTGTGTTGACGTCGAAAGAGA  |                     |
| <i>Sfur</i> FAR3-ORF-R          | TTATTTTTCTTTTCCAAAACTTA    |                     |
| <i>Sfur</i> DES2-104-F          | CCAGCGCAAAAACACATCCA       | qPCR                |
| <i>Sfur</i> DES2-104-R          | TCGTACTGTGGAGCTTCGTT       |                     |
| <i>Sfur</i> DES5-100-F          | ACCAGCACAAAACATAGCCGT      |                     |
| <i>Sfur</i> DES5-100-R          | TCCAAGTTCAGCTGTGCGATA      |                     |
| <i>Sfur</i> FAR2-135-F          | TCATCAGCCACAGCATGACAA      |                     |
| <i>Sfur</i> FAR2-135-R          | ATGATGATTGTGGGGACGTGT      |                     |
| <i>Sfur</i> FAR3-100-F          | ACTGGTGGAACGGGGTTTTT       |                     |
| <i>Sfur</i> FAR3-100-R          | CCTTCTTCTCCCTGATCAGCAT     |                     |
| <i>Sfur</i> RPS18-143-F         | GACTGGTTCCTCAACAGGCA       |                     |
| <i>Sfur</i> RPS18-143-R         | CCCCAGTAGTGACGCATACC       |                     |
| <i>Sfur</i> EF1 $\alpha$ -165-F | ACACCTGTGTTGGATTGCCA       |                     |
| <i>Sfur</i> EF1 $\alpha$ -165-R | AACACACAGAGGCTTGGAGG       |                     |
