# Supplementary material for: Genome-Wide Identification and Expression Profiling of Candidate Sex Pheromone Biosynthesis Genes in the Fall Armyworm (Spodoptera frugiperda)
Source: MDPI journal article supplement (doi:10.3390/insects13121078), 2022-11-23
Supplement: s1 [file s1]

Table S5 Summary of the transcriptome sequencing data of *Spodoptera frugiperda*

| Samples              | Total<br>raw reads | Clean reads | Clean bases | ≥Q30<br>(%) | GC<br>(%) | Total Mapped<br>reads | Total Mapped<br>ratio |
|----------------------|--------------------|-------------|-------------|-------------|-----------|-----------------------|-----------------------|
| Pheromone<br>gland-1 | 44514412           | 43013248    | 6.45G       | 91.21       | 45.99     | 33927289              | 78.88                 |
| Pheromone<br>gland-2 | 47957898           | 47215578    | 7.08G       | 90.33       | 45.73     | 37180432              | 78.75                 |
| Pheromone<br>gland-3 | 45285150           | 44386310    | 6.66G       | 90.79       | 45.34     | 34881462              | 78.59                 |
| Abdomen-1            | 43864586           | 42119612    | 6.32G       | 91.16       | 44.91     | 32663382              | 77.55                 |
| Abdomen-2            | 45225078           | 43985546    | 6.60G       | 91.11       | 43.09     | 33920468              | 77.12                 |
| Abdomen-3            | 47856708           | 46709310    | 7.01G       | 90.96       | 43.09     | 36146741              | 77.39                 |
