# Supplementary material for: Genome-Wide Identification and Expression Profiling of Candidate Sex Pheromone Biosynthesis Genes in the Fall Armyworm (Spodoptera frugiperda)
Source: MDPI journal article supplement (doi:10.3390/insects13121078), 2022-11-23
Supplement: s1 [file s1]

Table S4 Primer amplicon characteristics of 4 genes for qRT-PCR.

| Gene Name       | Efficiently (%) | R <sup>2</sup> | Linear regression equation |
|-----------------|-----------------|----------------|----------------------------|
| <i>SfruDES2</i> | 106.0           | 0.9990         | $y = -3.186x + 19.196$     |
| <i>SfruDES5</i> | 98.0            | 0.9999         | $y = -3.3706x + 16.571$    |
| <i>SfruFAR2</i> | 102.1           | 0.9999         | $y = -3.273x + 20.2$       |
| <i>SfruFAR3</i> | 108.4           | 0.9985         | $y = -3.1348x + 16.327$    |
